# Supplementary material for: Biomarker‐Guided Individualization of Antibiotic Therapy
Source: PubMed Central journal article supplement — Clin Pharmacol Ther. 2021 Mar 2;110(2):346–60. doi: 10.1002/cpt.2194 (PMC8359228; doi:10.1002/cpt.2194), 2021-03-02
Supplement: CPT-110-346-s003.pdf [file CPT-110-346-s003.pdf]

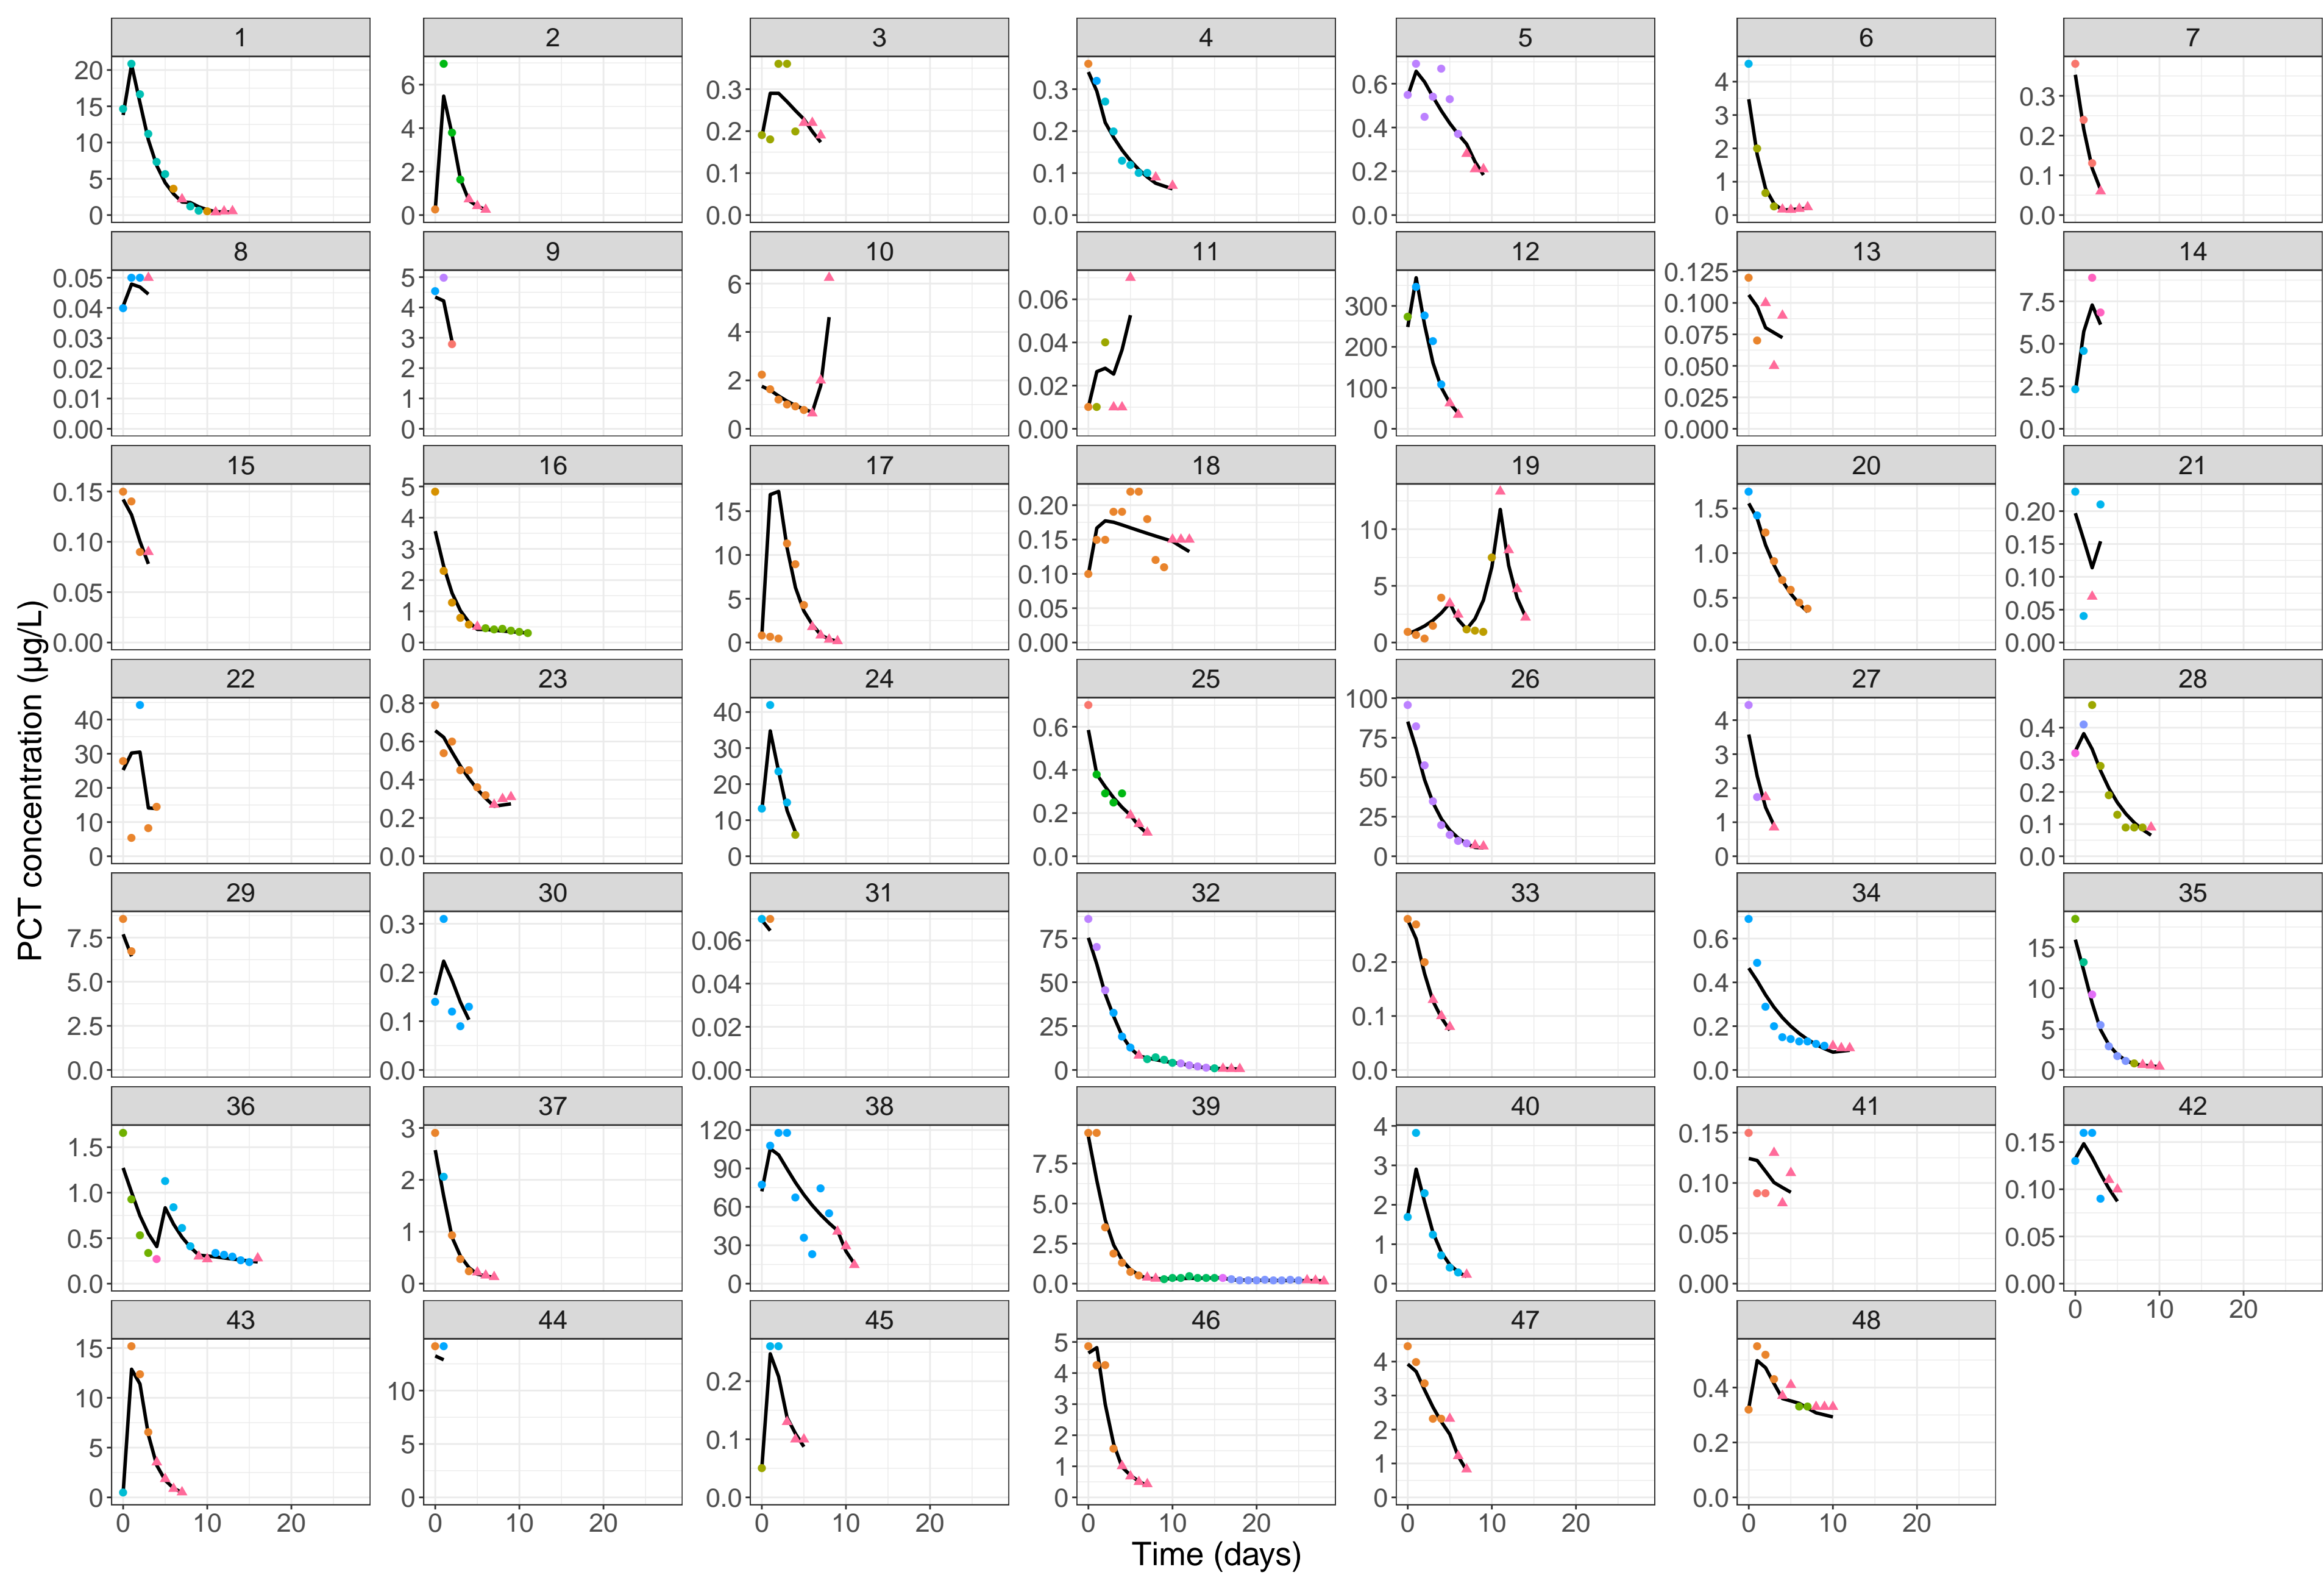

Figure S1. Procalcitonin profiles. Observed procalcitonin profiles (points) and model predictions (solid lines) for all individuals included in the analysis. Colored points indicate different treatments, consisting up to three antibiotics, while triangles indicates observation without any treatment.

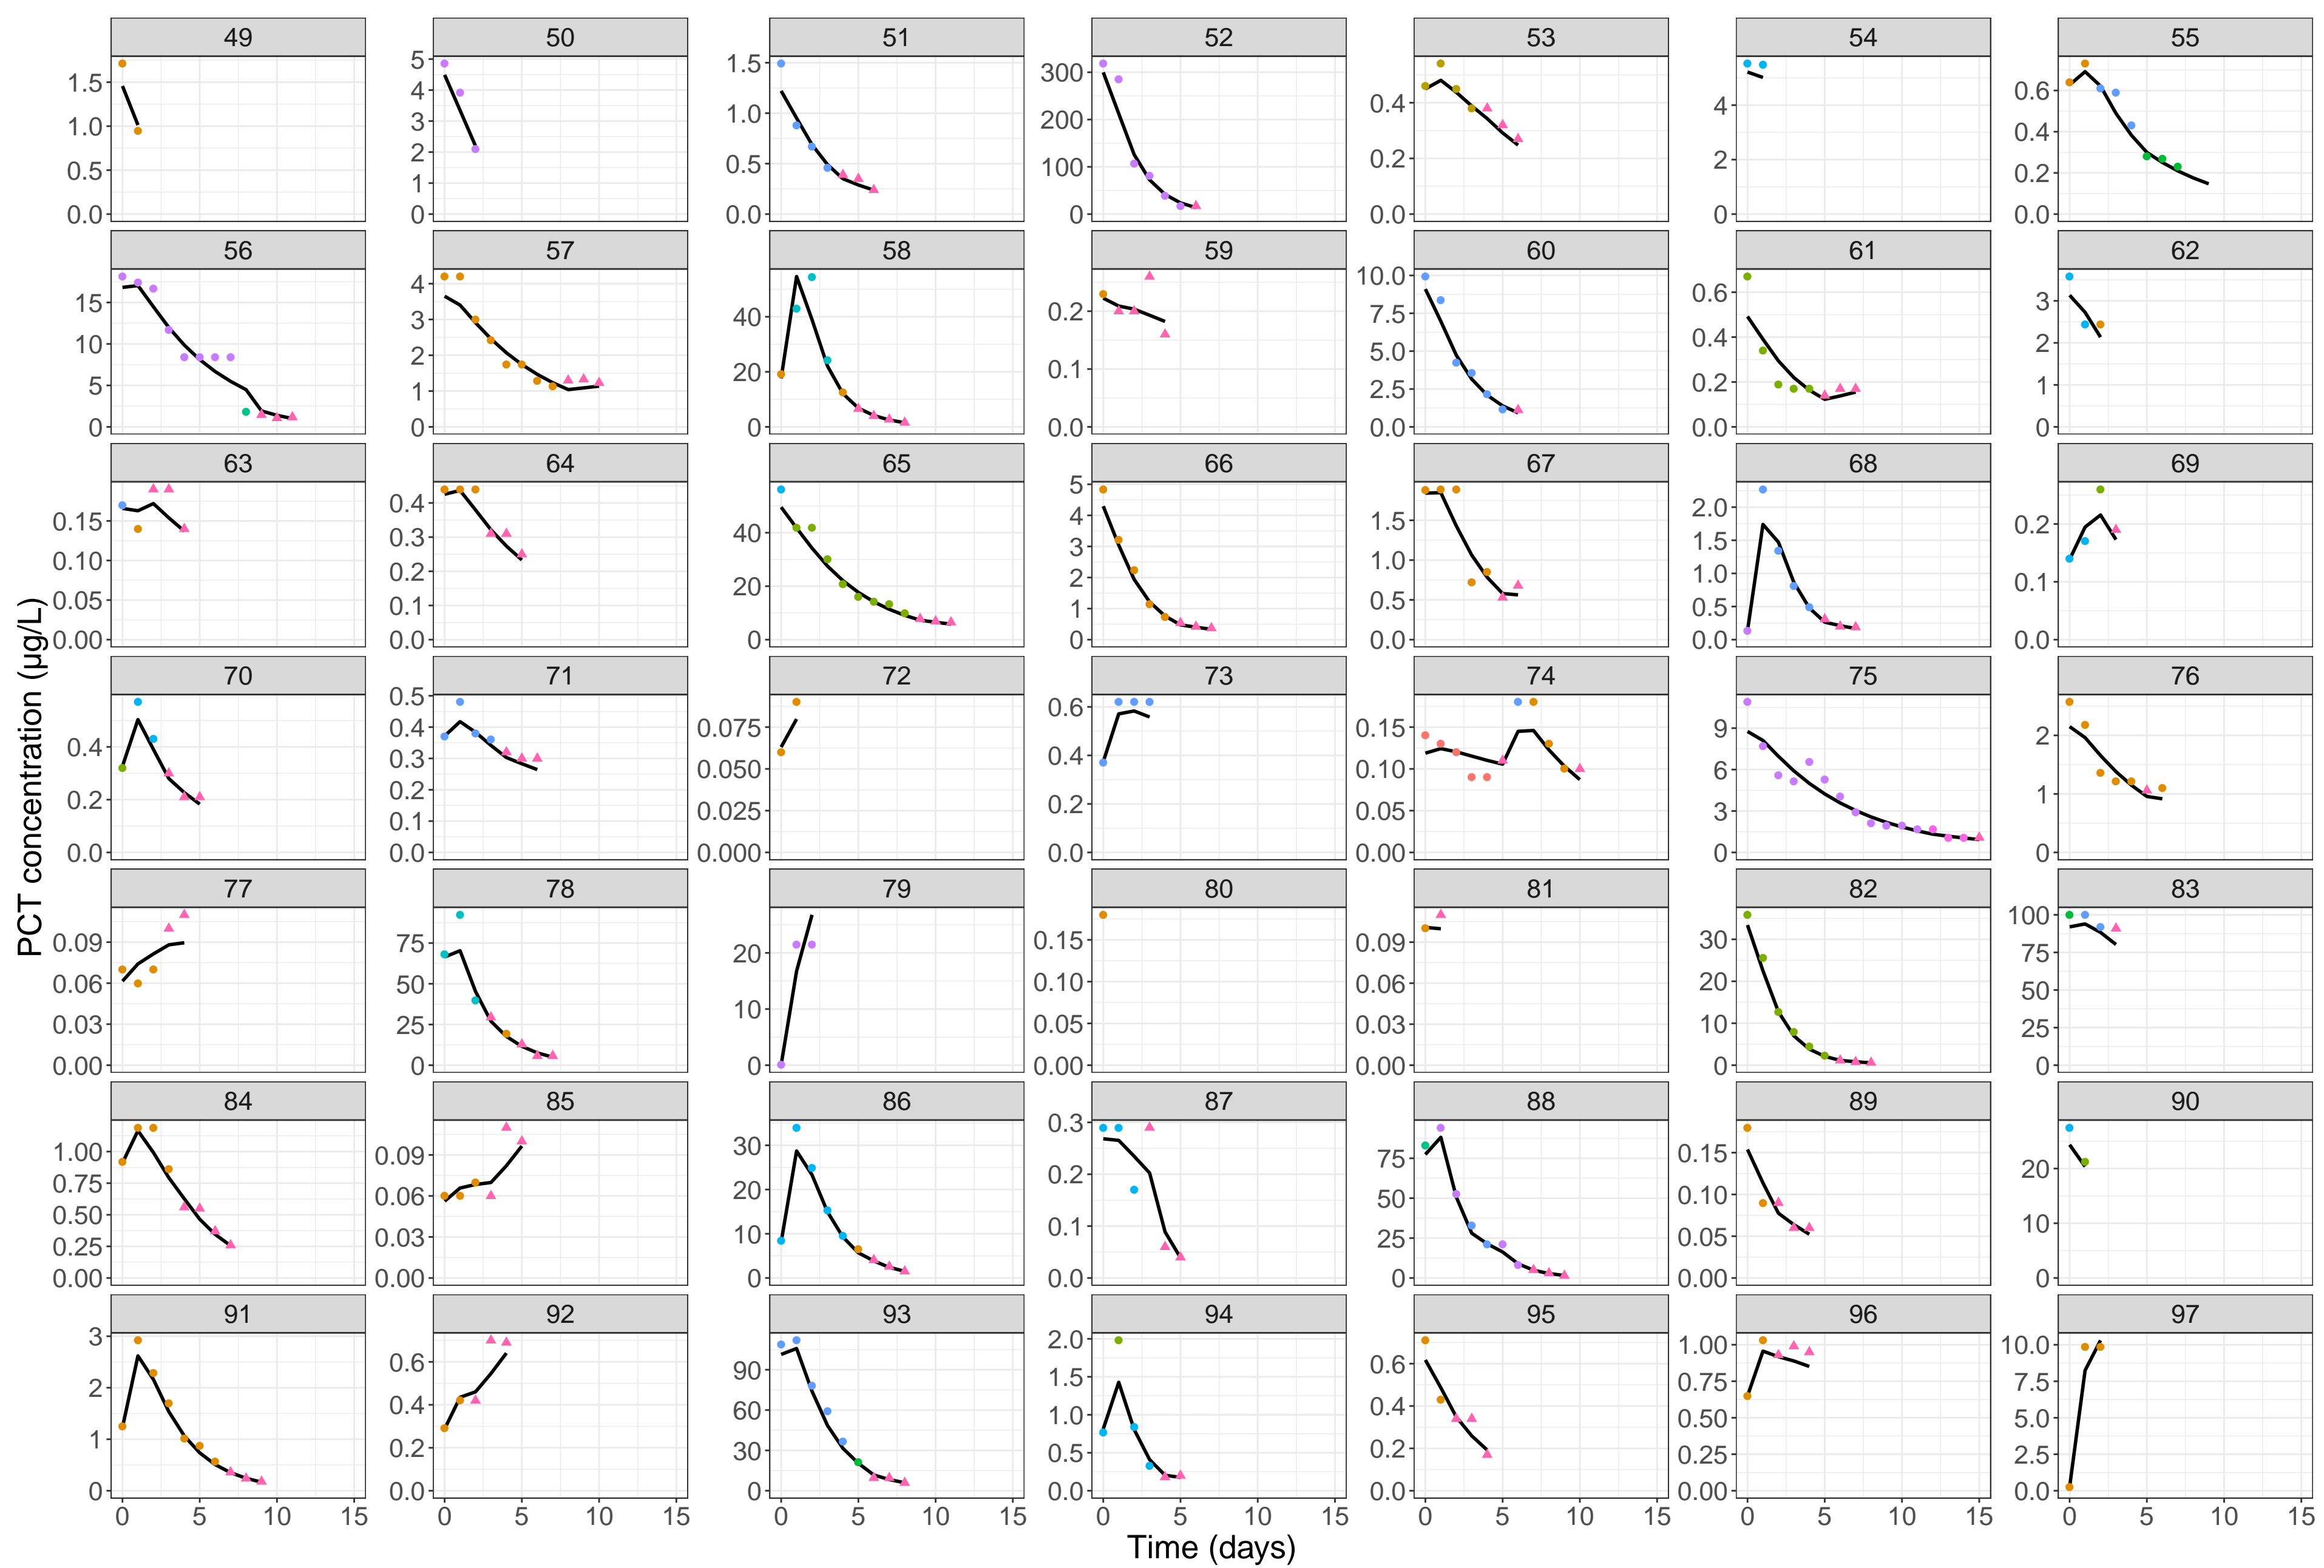

Figure S1. Procalcitonin profiles. Observed procalcitonin profiles (points) and model predictions (solid lines) for all individuals included in the analysis. Colored points indicate different treatments, consisting up to three antibiotics, while triangles indicates observation without any treatment.

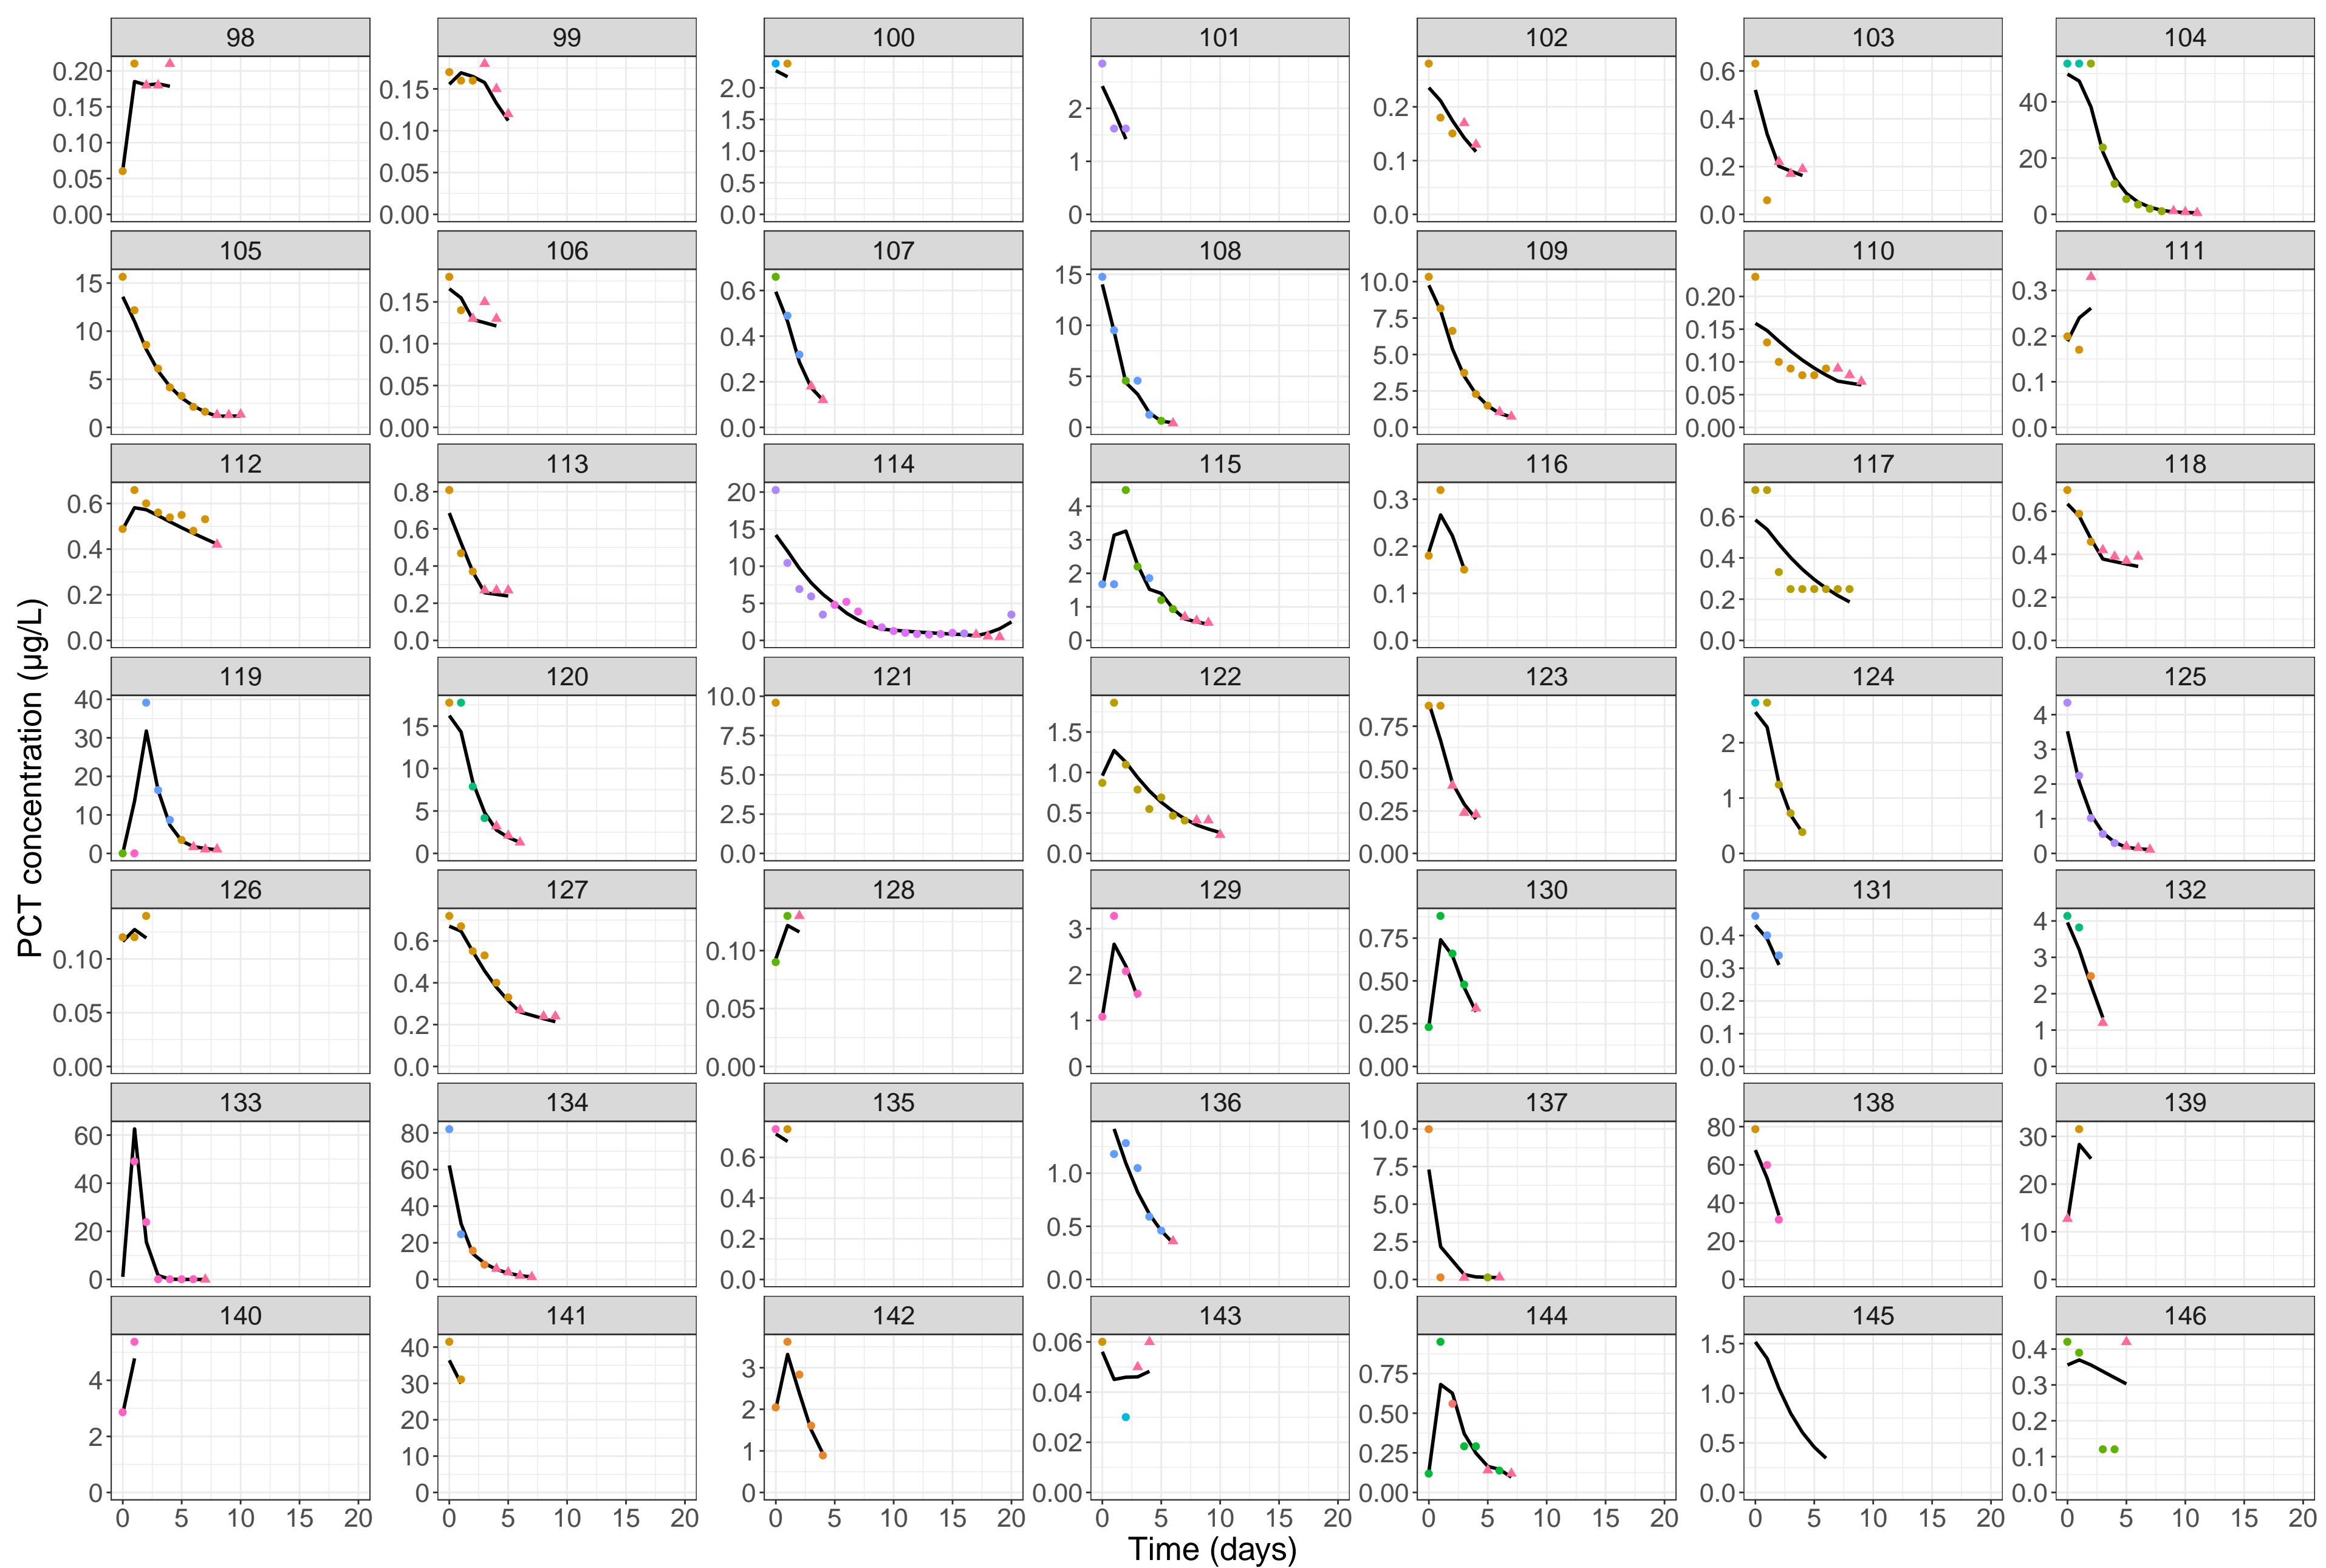

Figure S1. Procalcitonin profiles. Observed procalcitonin profiles (points) and model predictions (solid lines) for all individuals included in the analysis. Colored points indicate different treatments, consisting up to three antibiotics, while triangles indicates observation without any treatment.

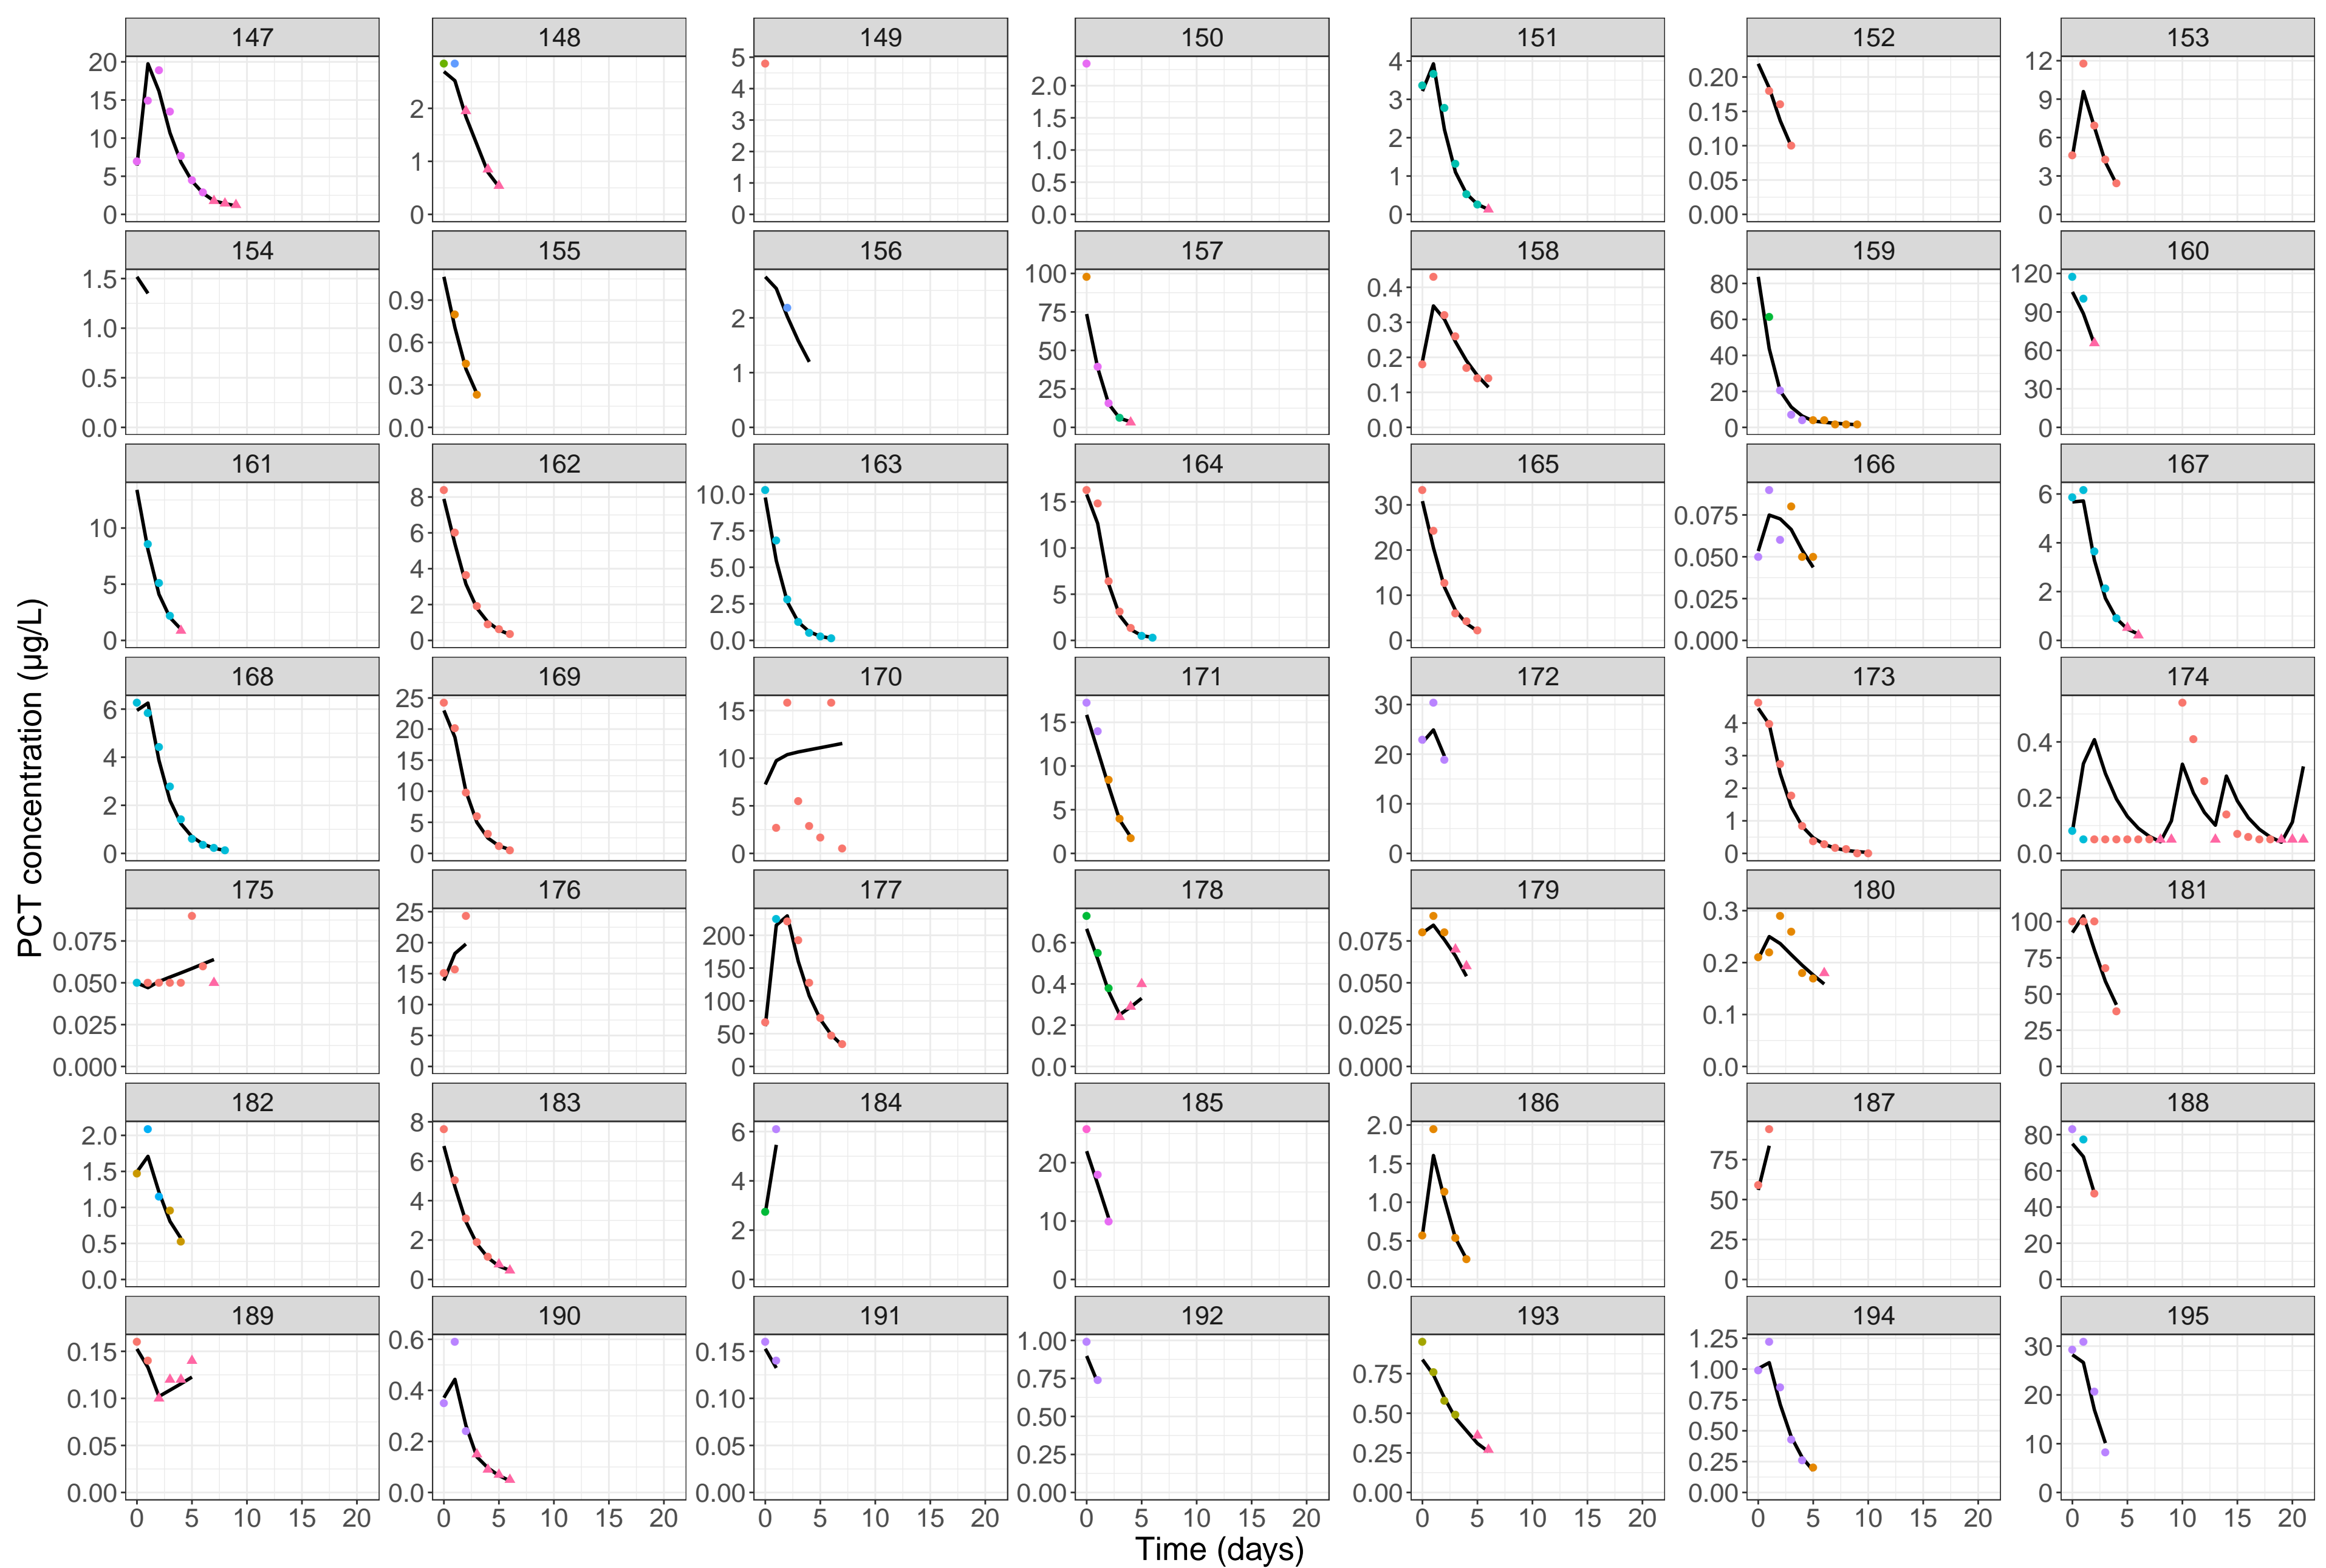

Figure S1. Procalcitonin profiles. Observed procalcitonin profiles (points) and model predictions (solid lines) for all individuals included in the analysis. Colored points indicate different treatments, consisting up to three antibiotics, while triangles indicates observation without any treatment.

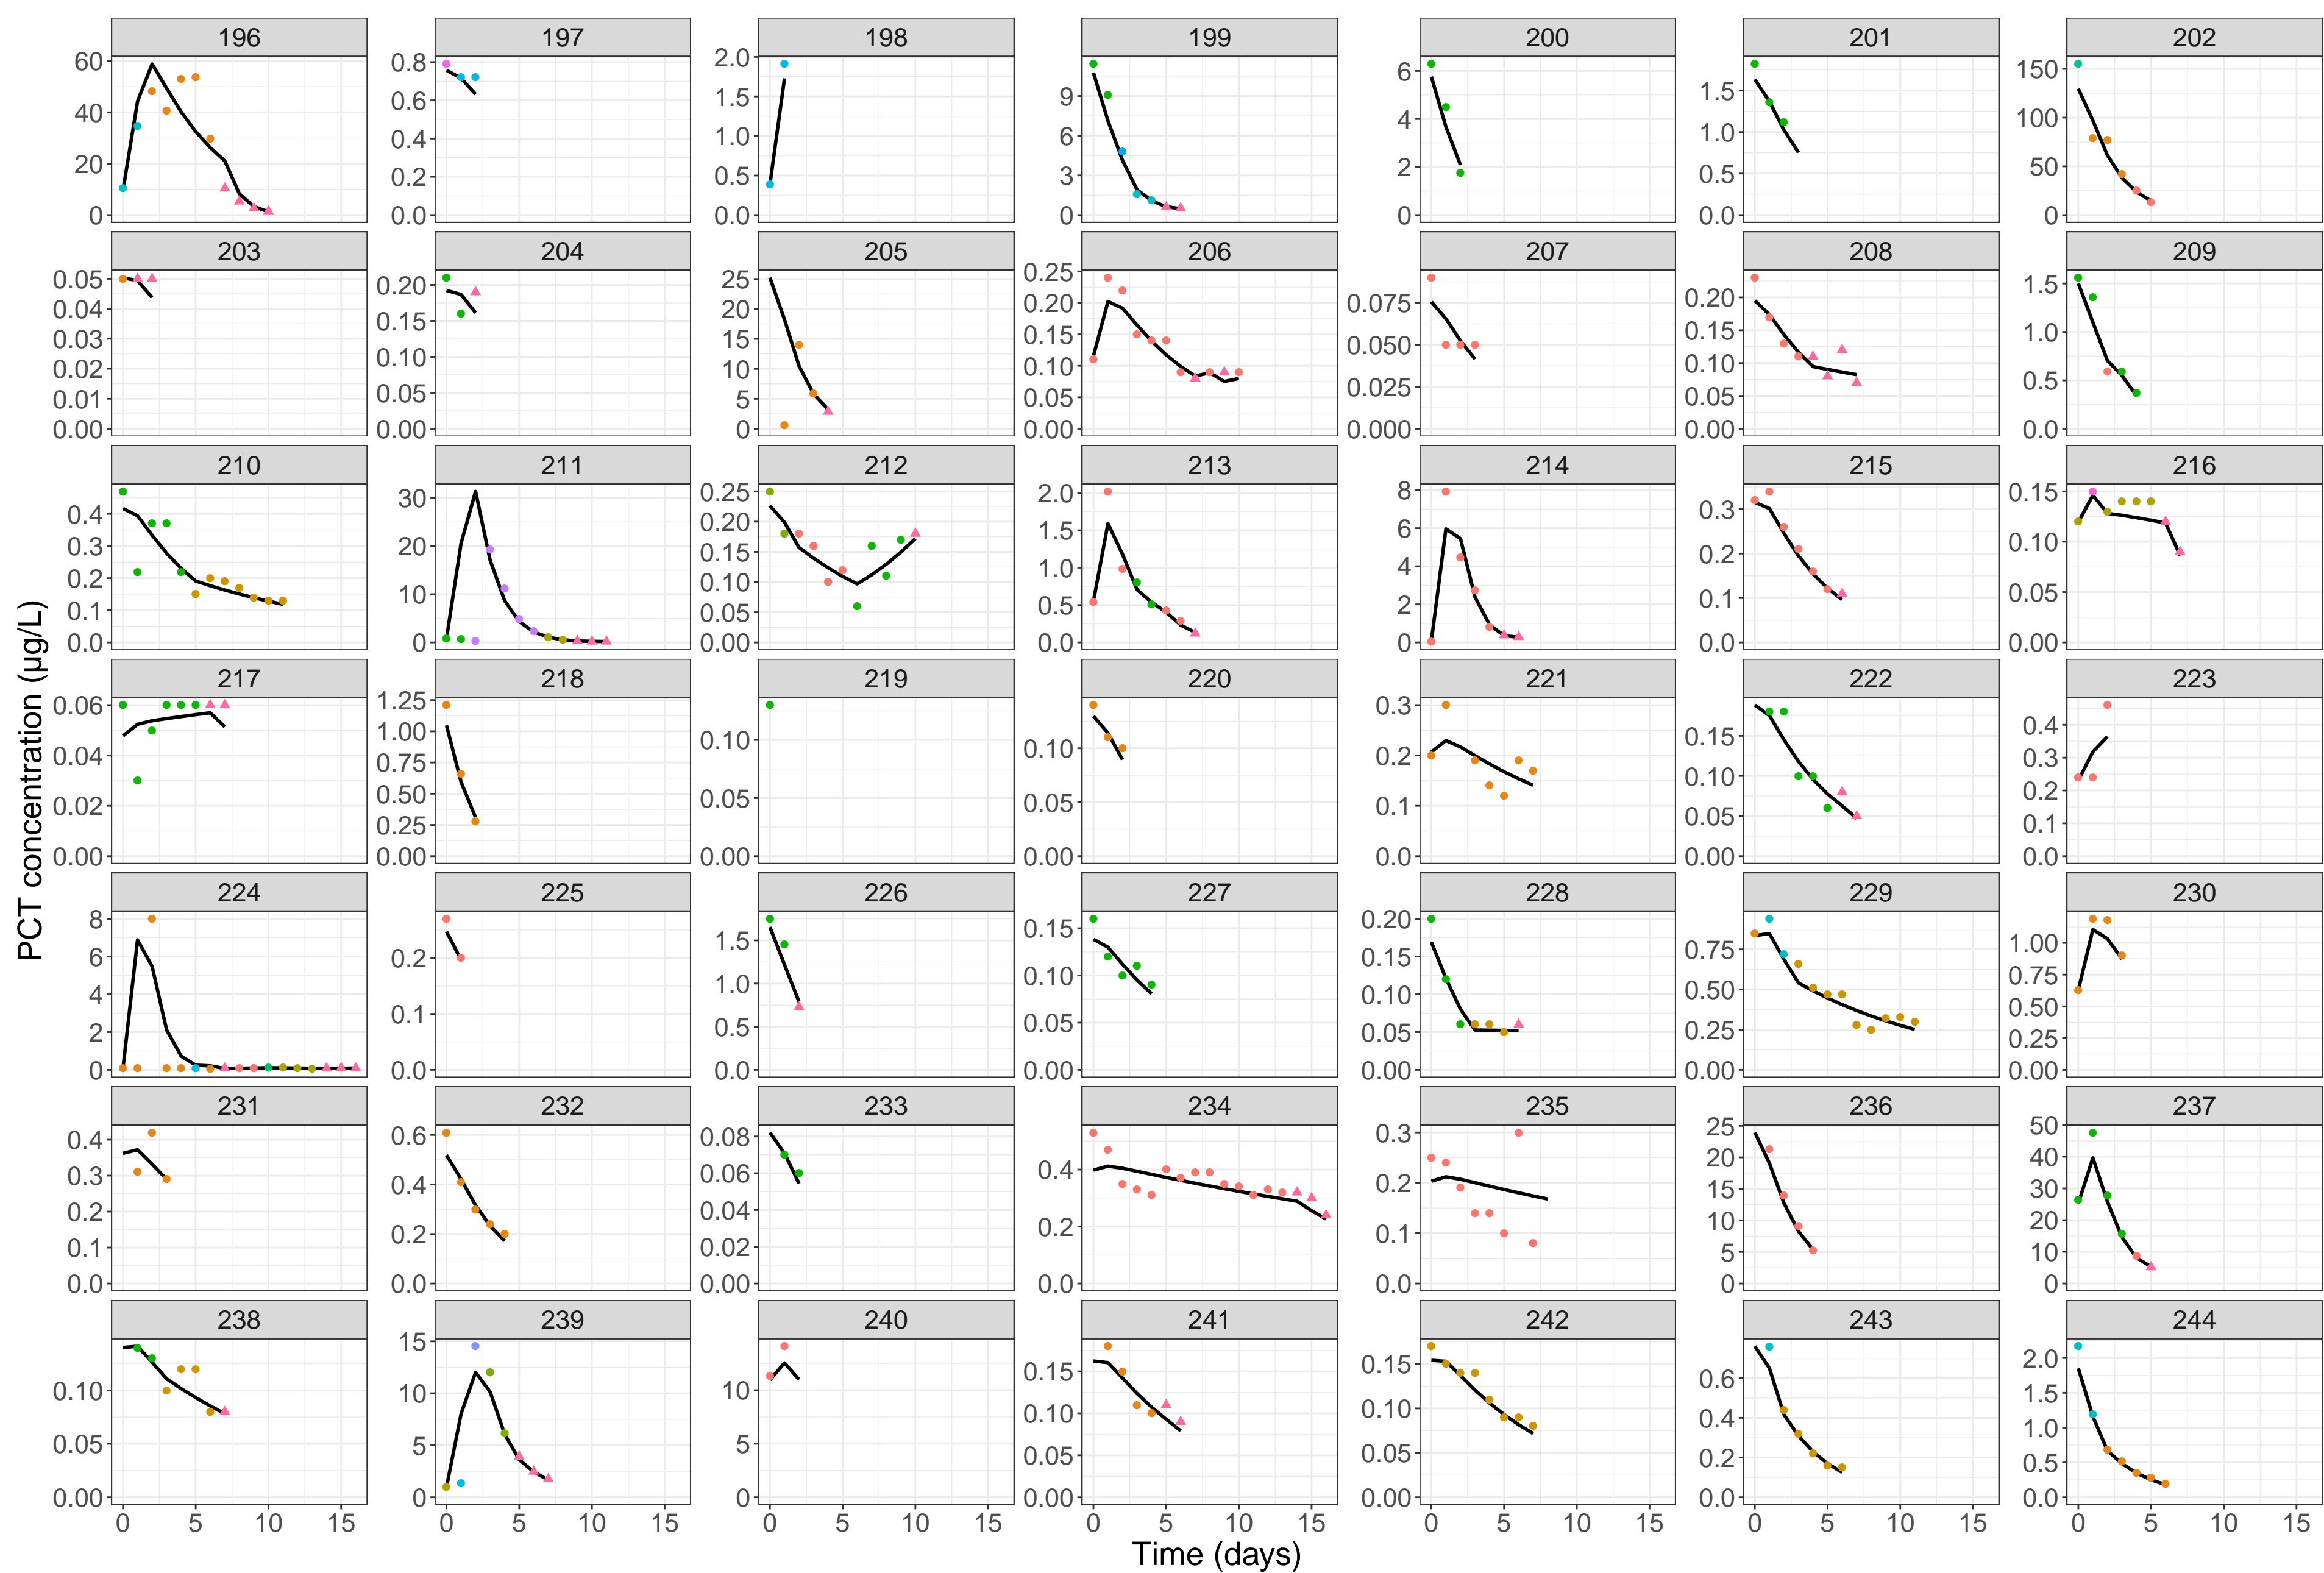

Figure S1. Procalcitonin profiles. Observed procalcitonin profiles (points) and model predictions (solid lines) for all individuals included in the analysis. Colored points indicate different treatments, consisting up to three antibiotics, while triangles indicates observation without any treatment.

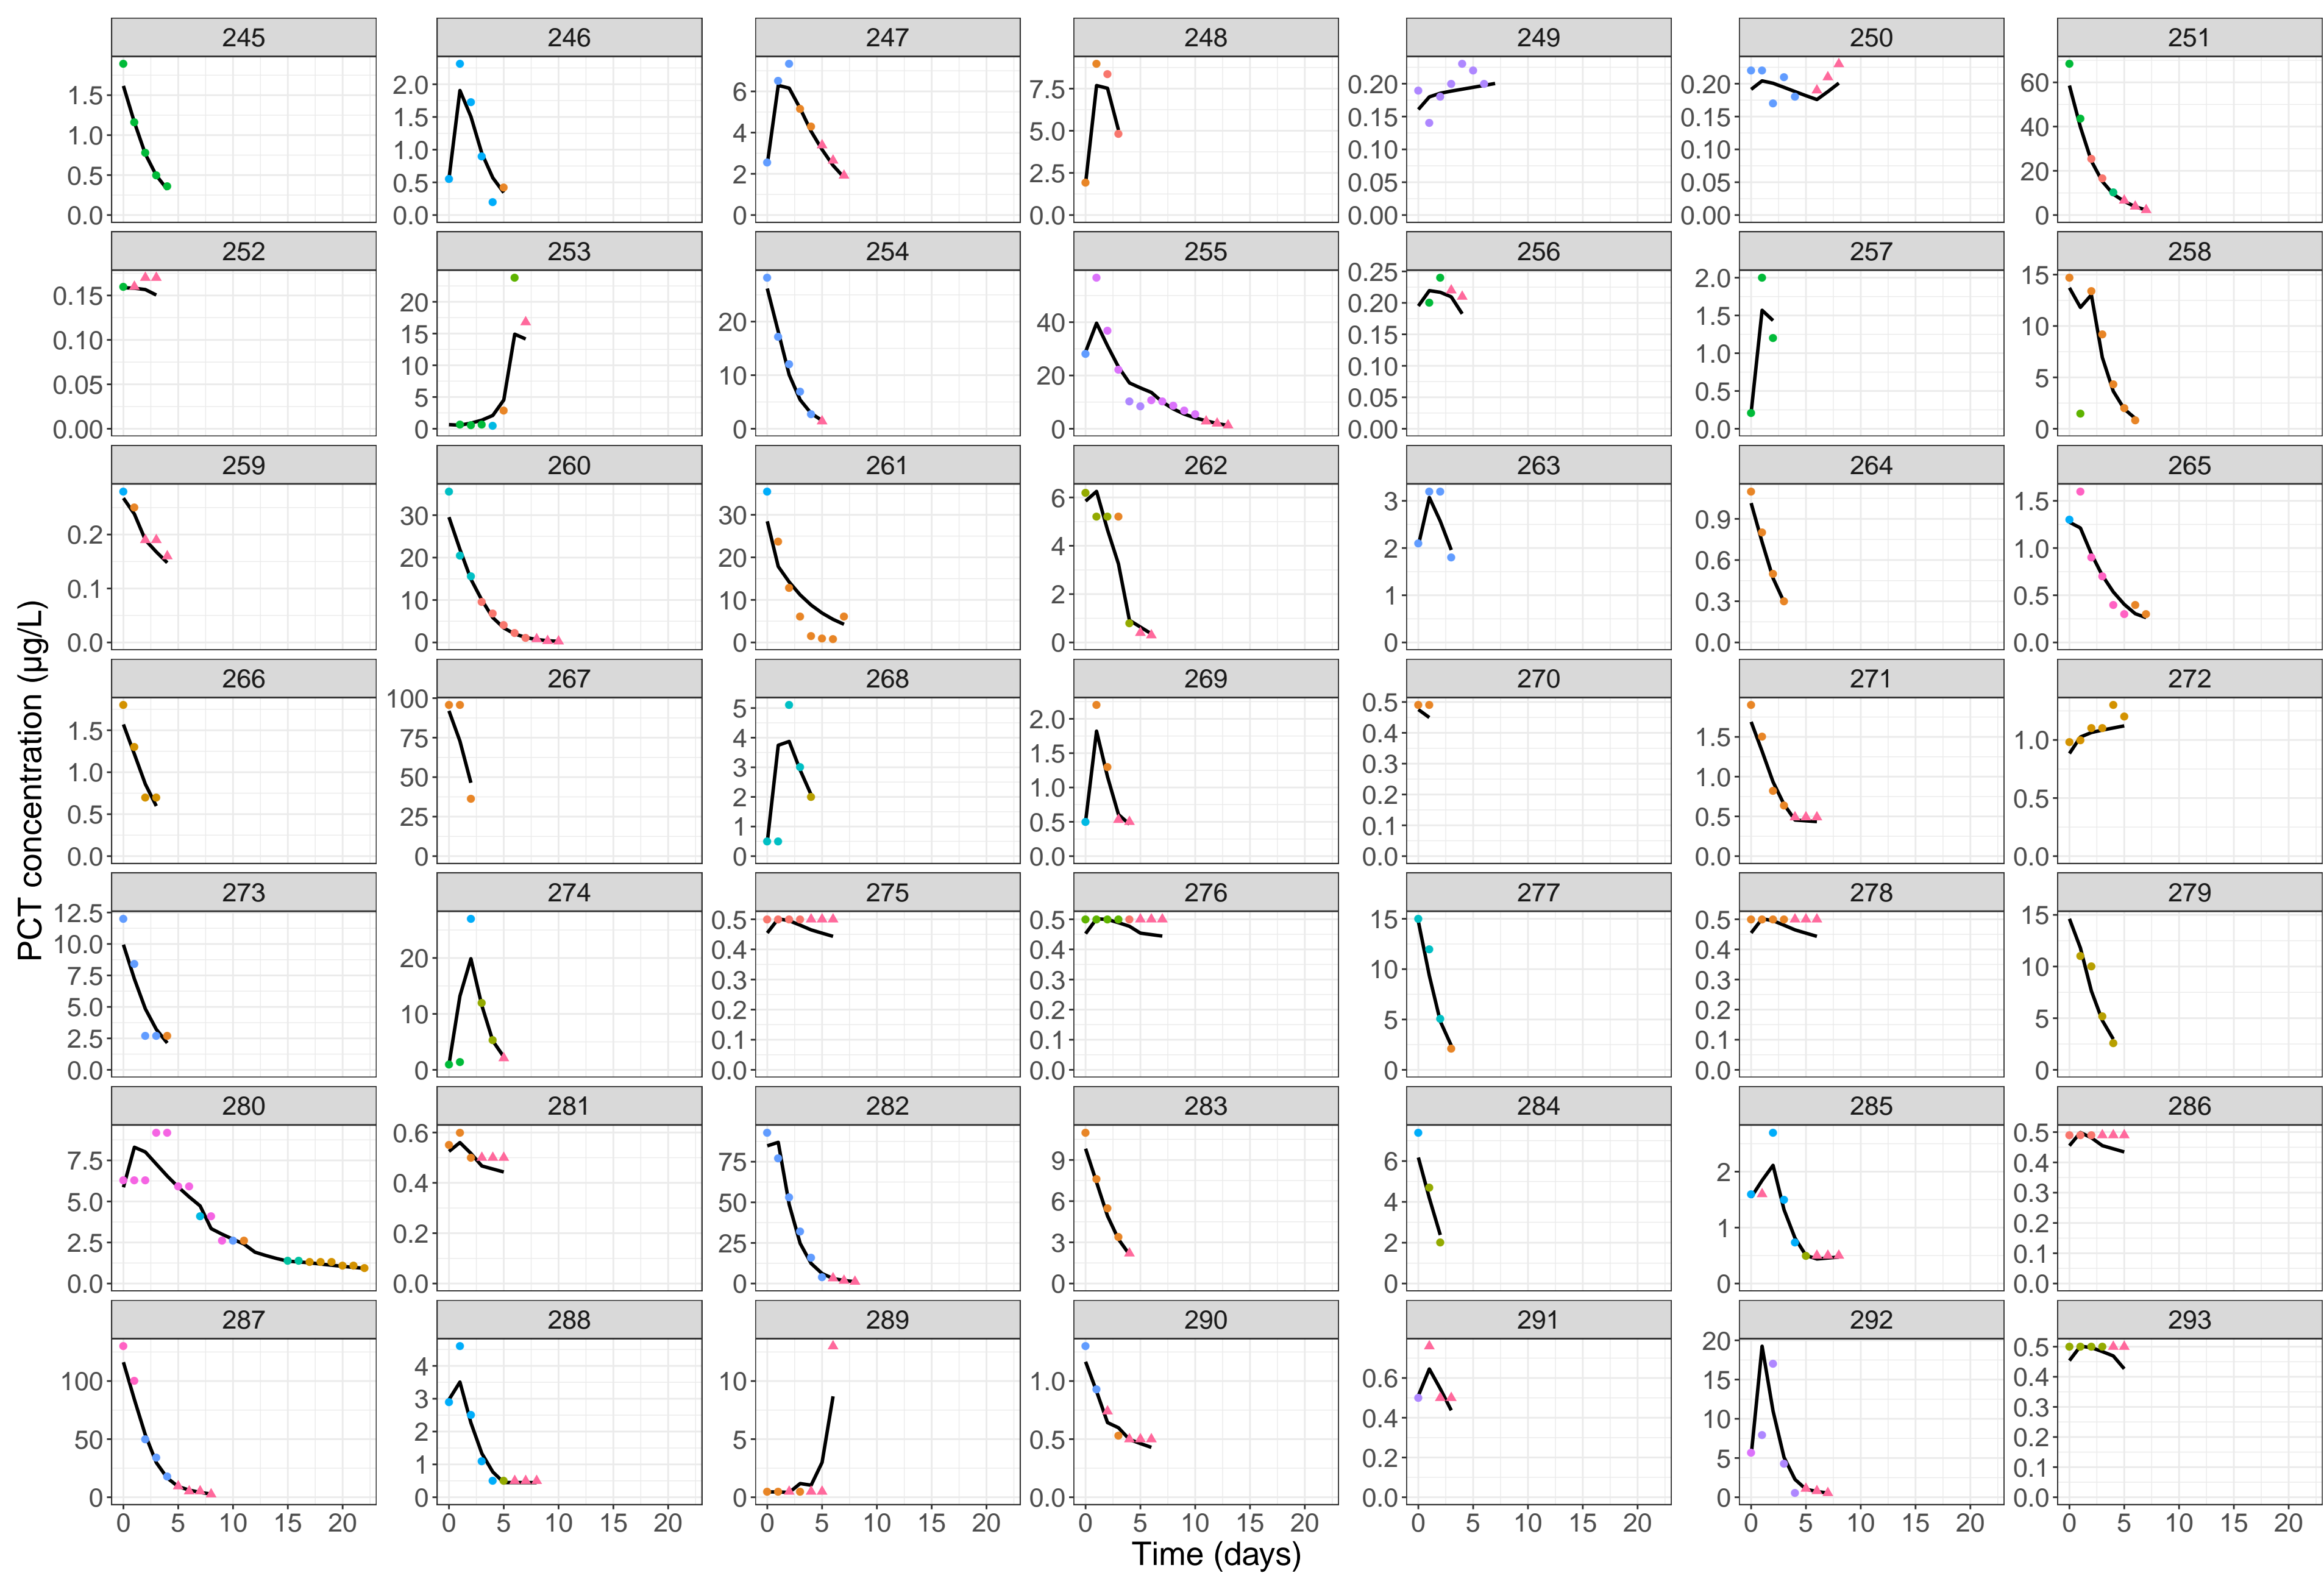

Figure S1. Procalcitonin profiles. Observed procalcitonin profiles (points) and model predictions (solid lines) for all individuals included in the analysis. Colored points indicate different treatments, consisting up to three antibiotics, while triangles indicates observation without any treatment.

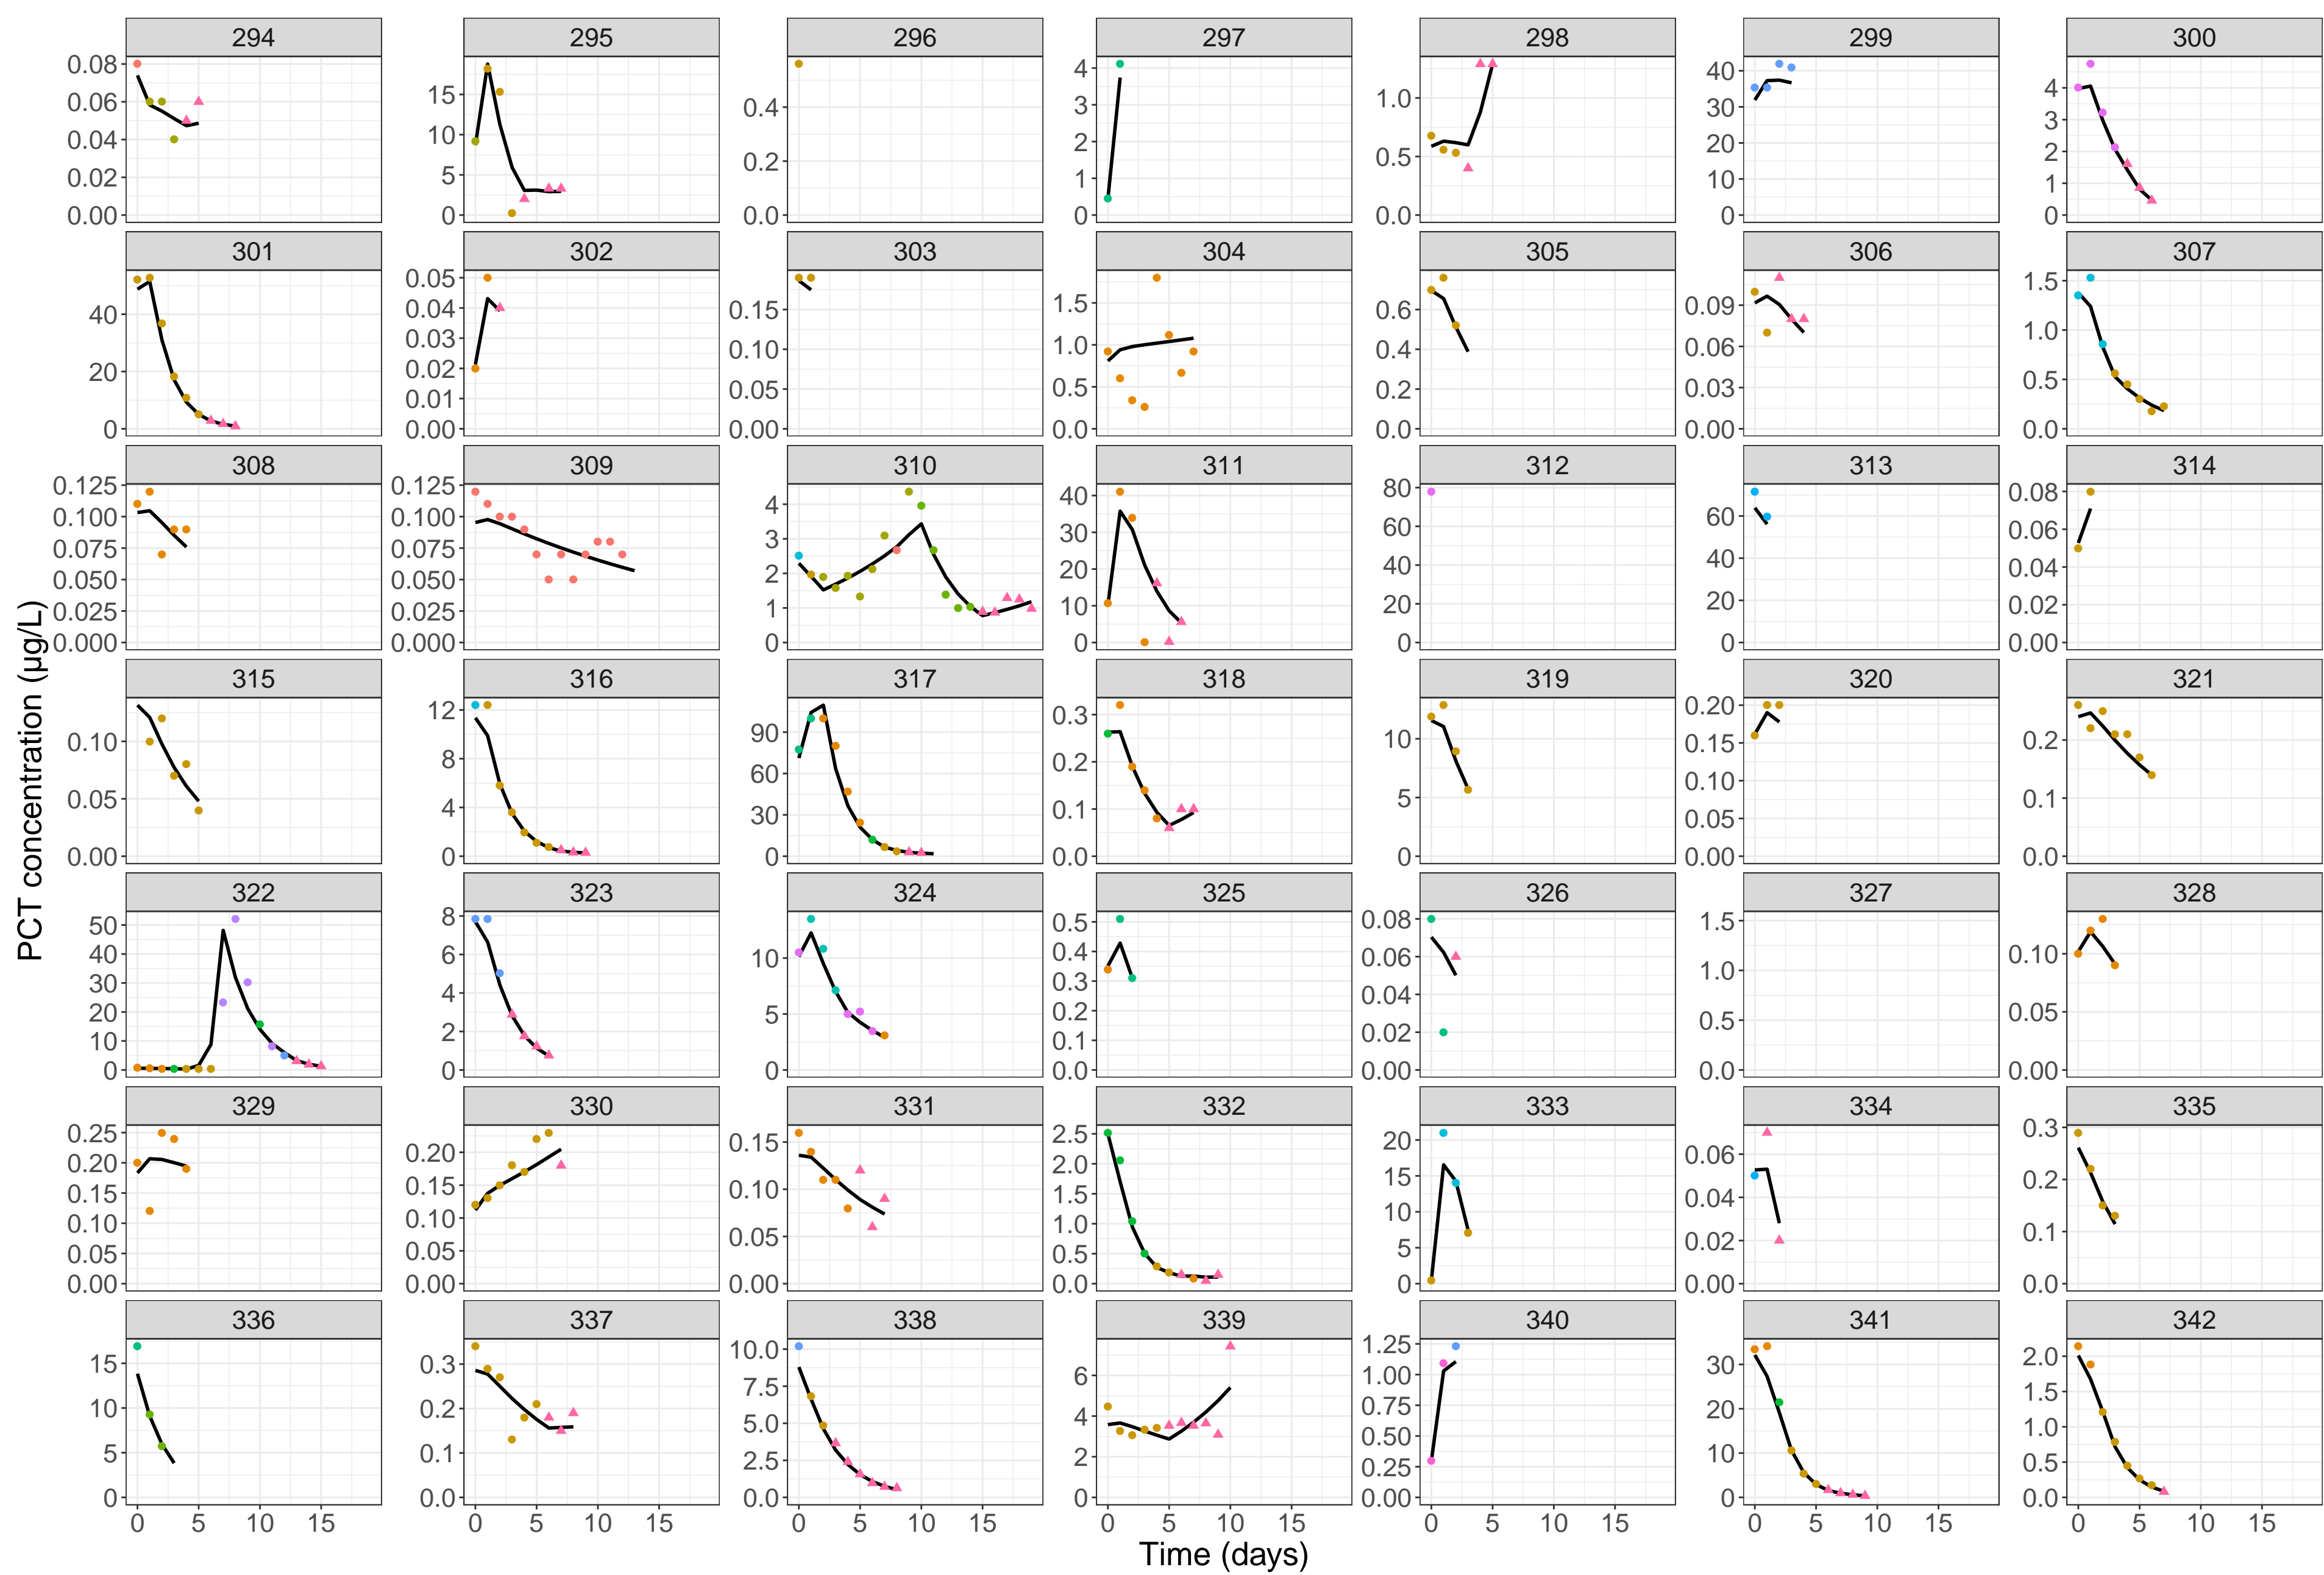

Figure S1. Procalcitonin profiles. Observed procalcitonin profiles (points) and model predictions (solid lines) for all individuals included in the analysis. Colored points indicate different treatments, consisting up to three antibiotics, while triangles indicates observation without any treatment.

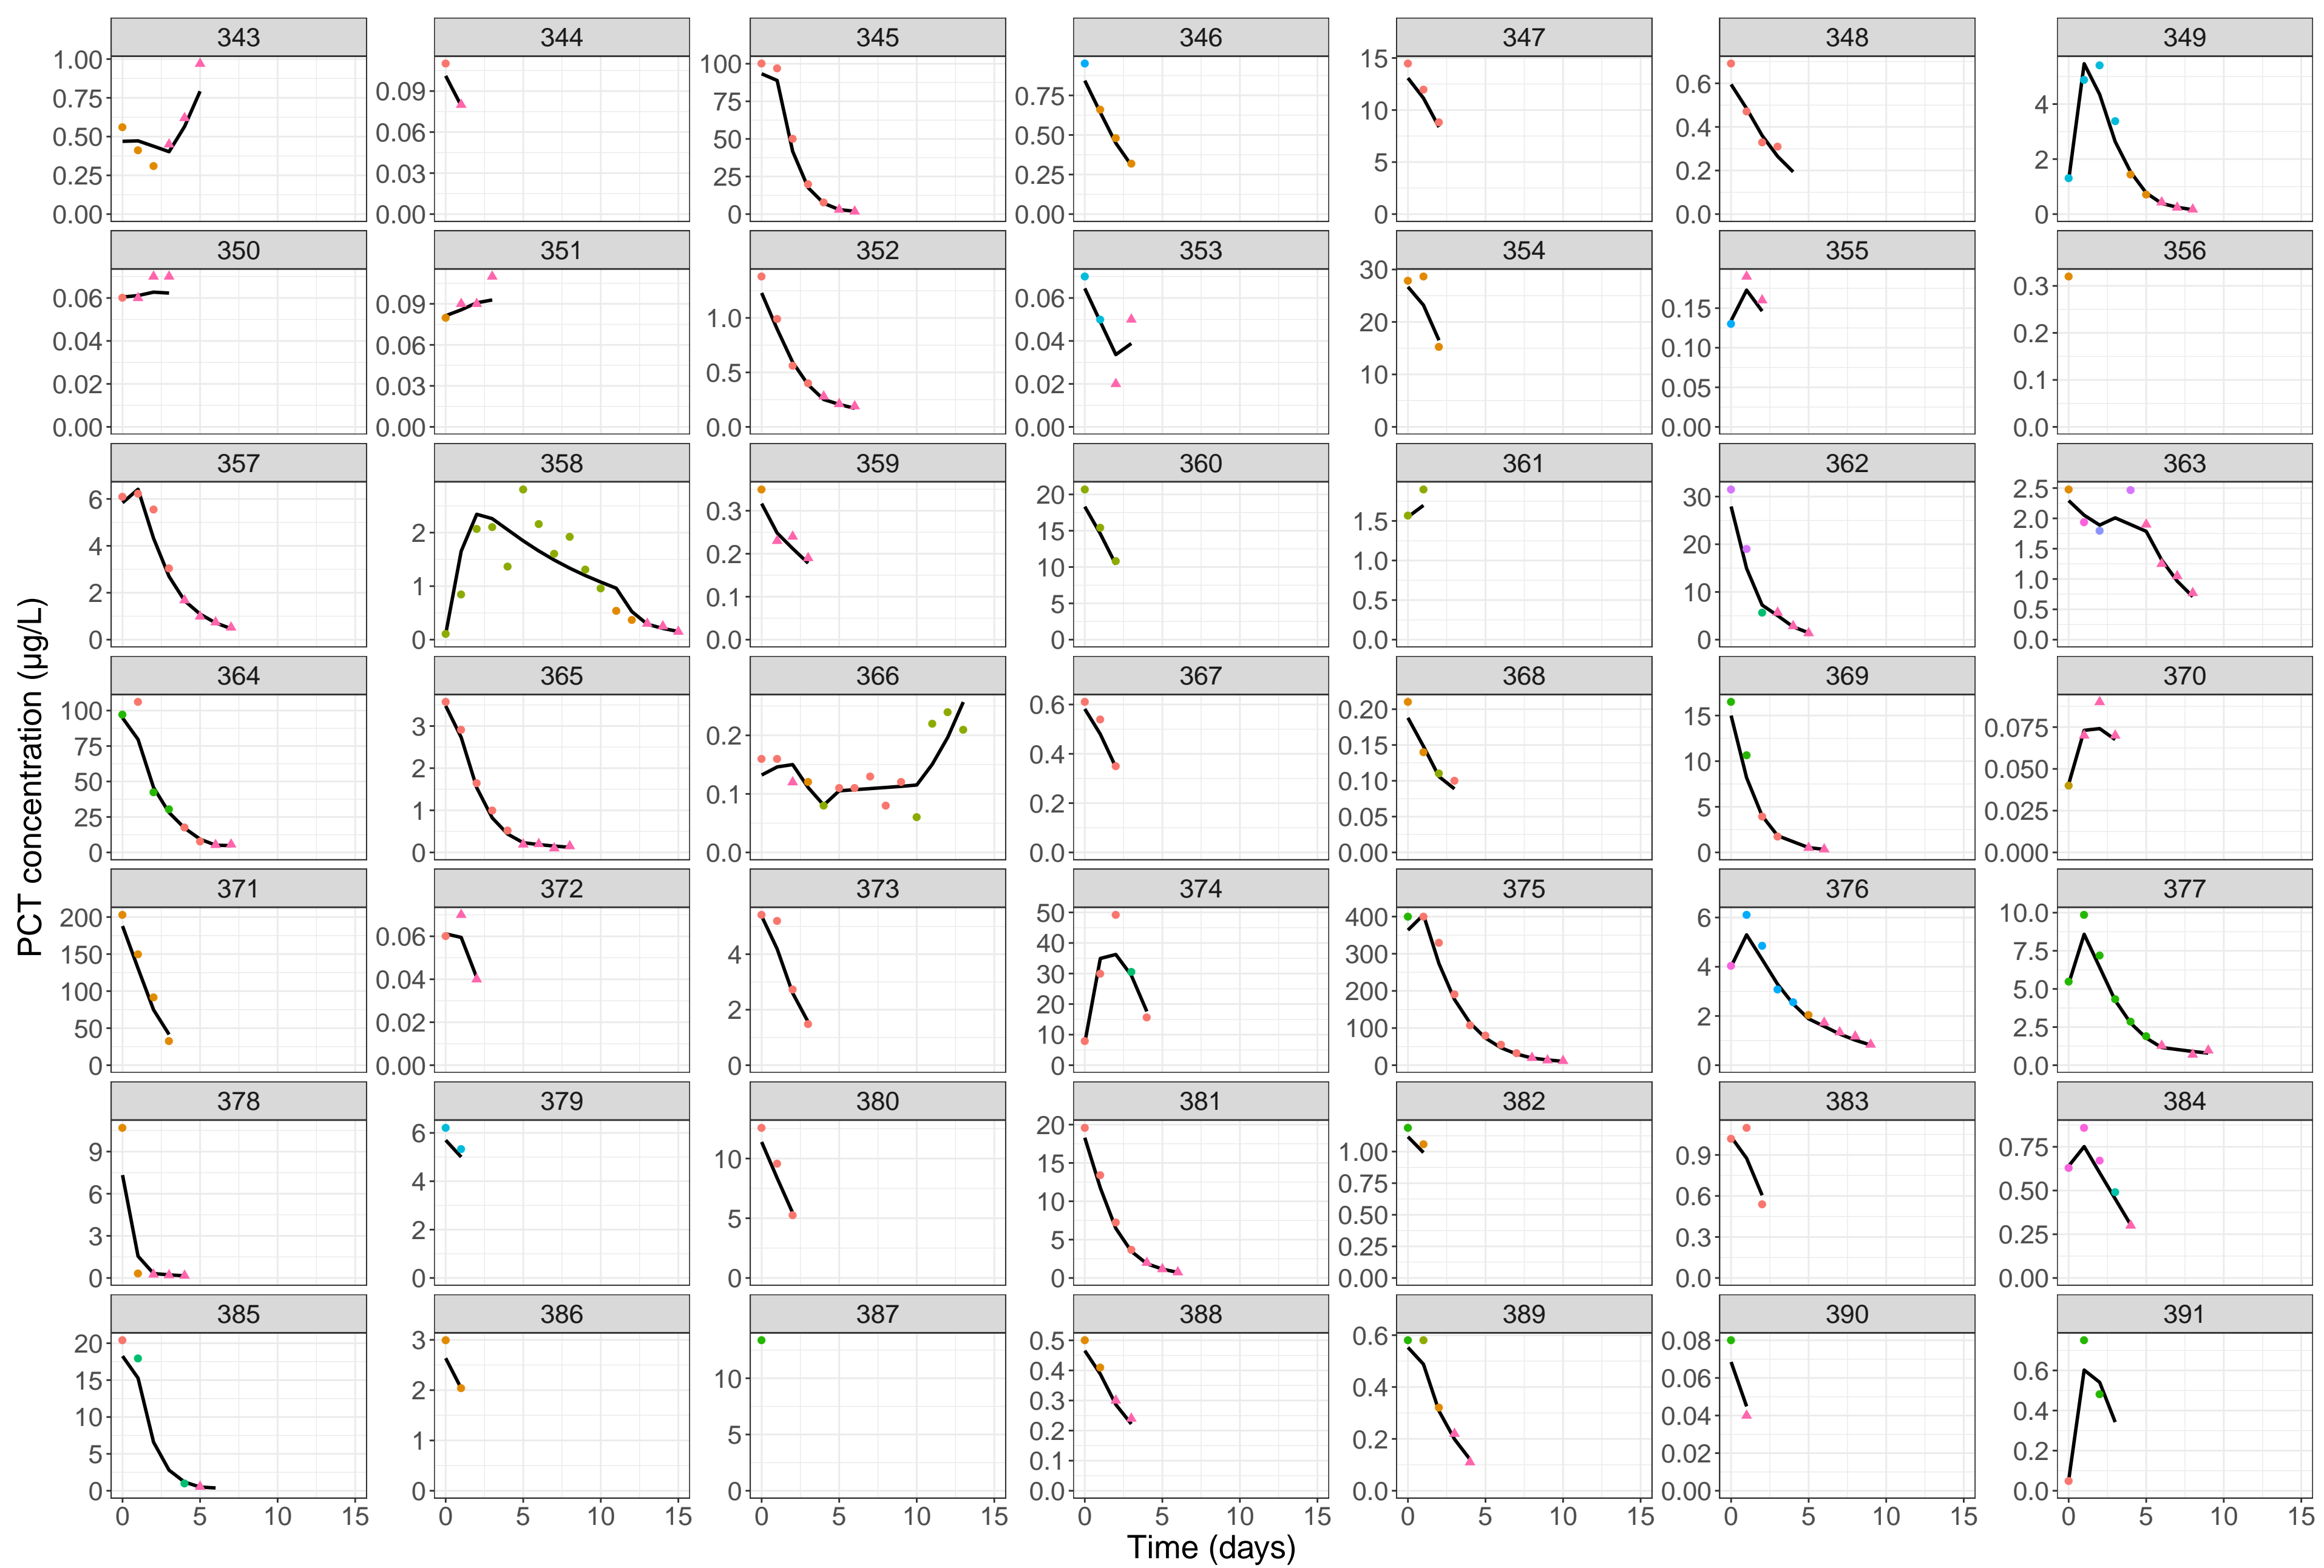

Figure S1. Procalcitonin profiles. Observed procalcitonin profiles (points) and model predictions (solid lines) for all individuals included in the analysis. Colored points indicate different treatments, consisting up to three antibiotics, while triangles indicates observation without any treatment.



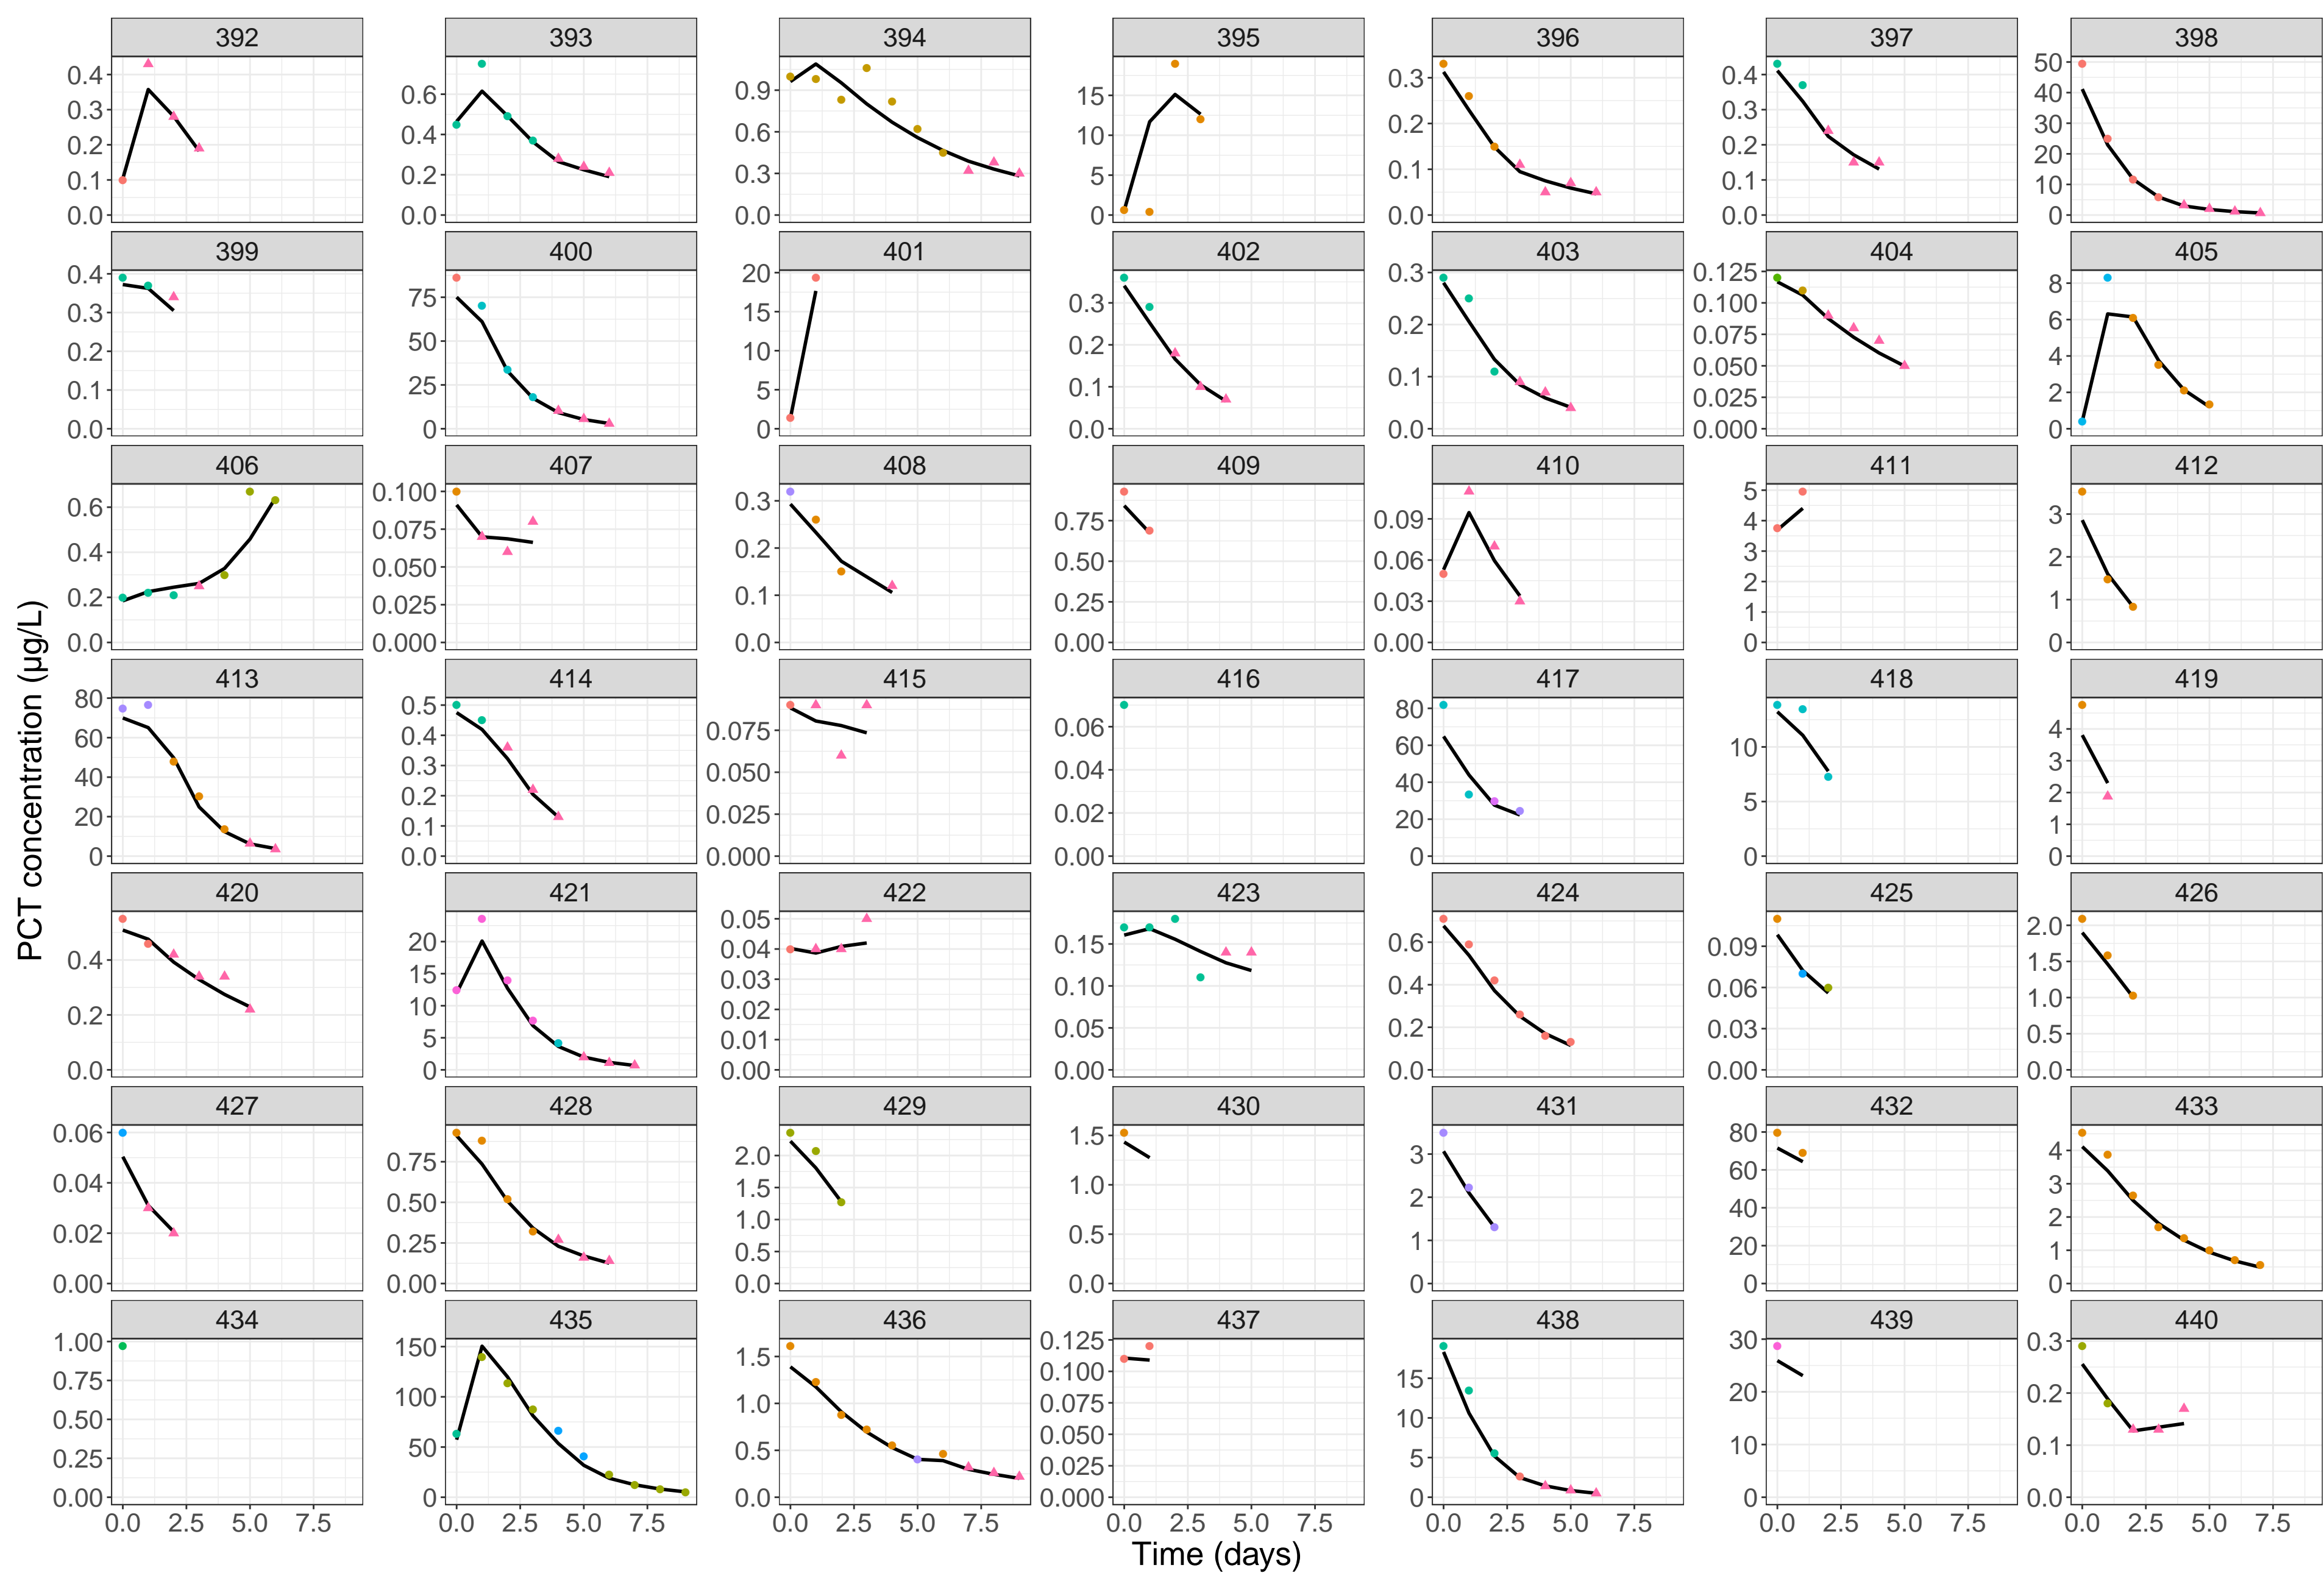

Figure S1. Procalcitonin profiles. Observed procalcitonin profiles (points) and model predictions (solid lines) for all individuals included in the analysis. Colored points indicate different treatments, consisting up to three antibiotics, while triangles indicates observation without any treatment.

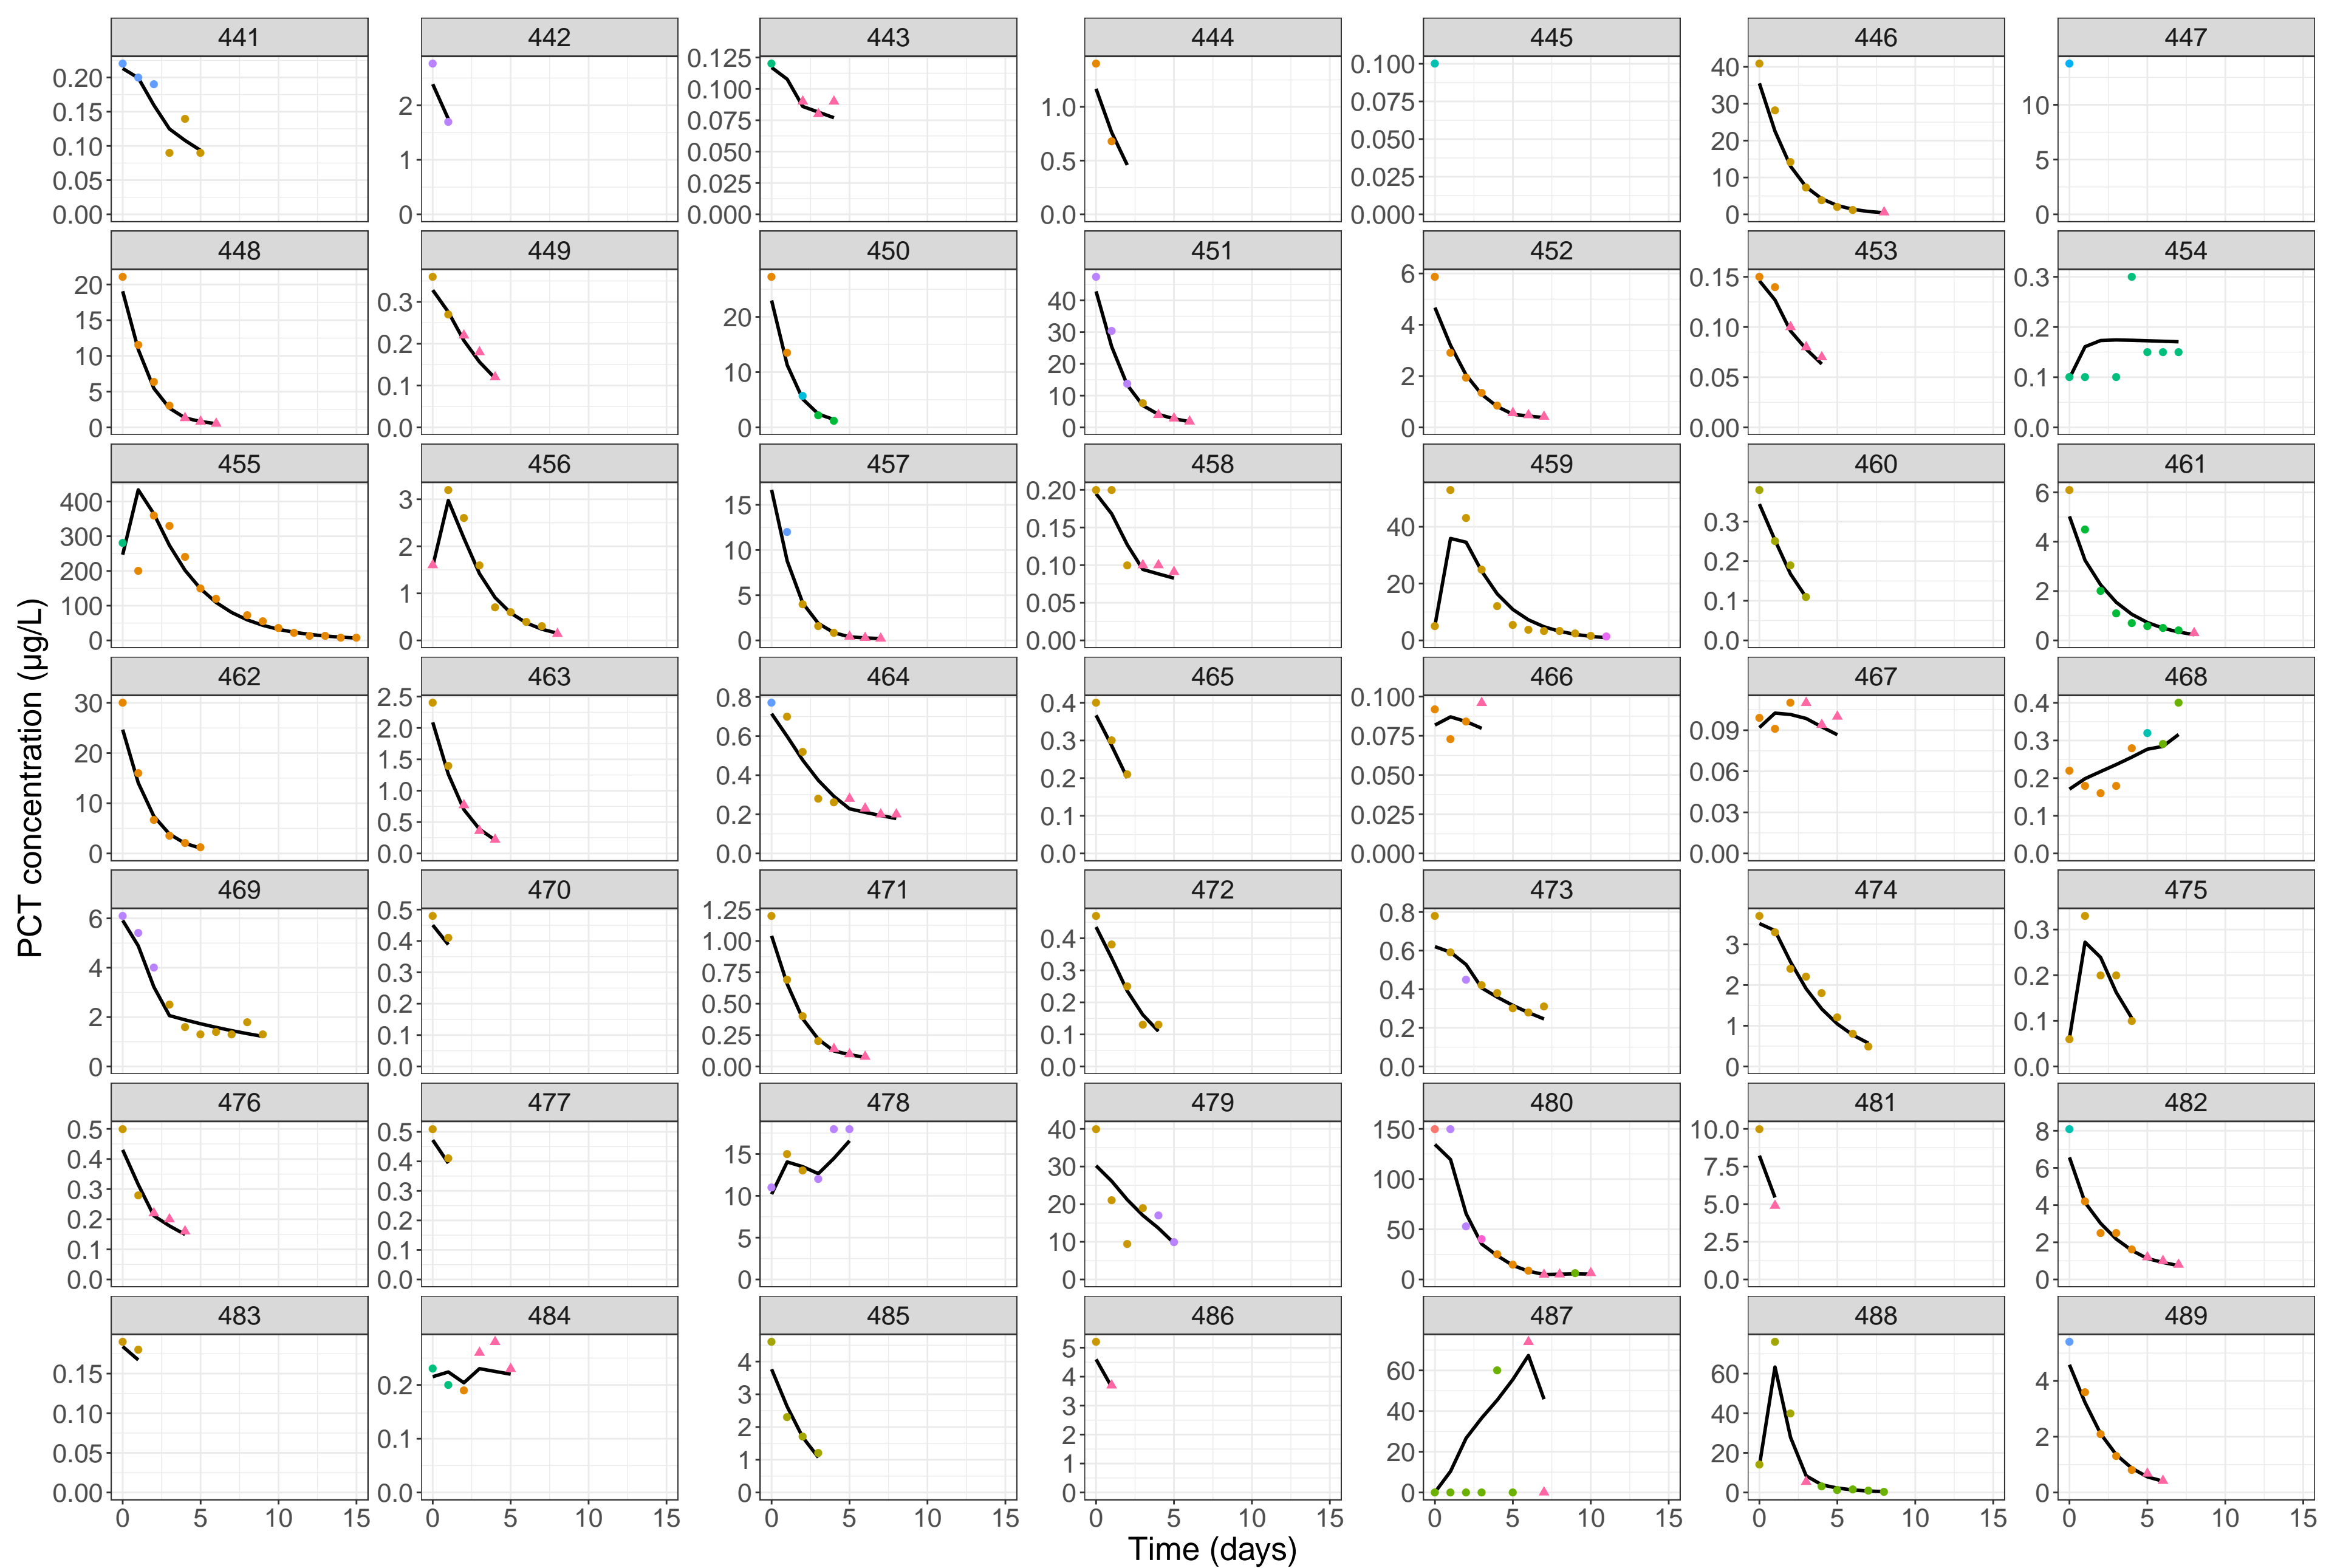

Figure S1. Procalcitonin profiles. Observed procalcitonin profiles (points) and model predictions (solid lines) for all individuals included in the analysis. Colored points indicate different treatments, consisting up to three antibiotics, while triangles indicates observation without any treatment.

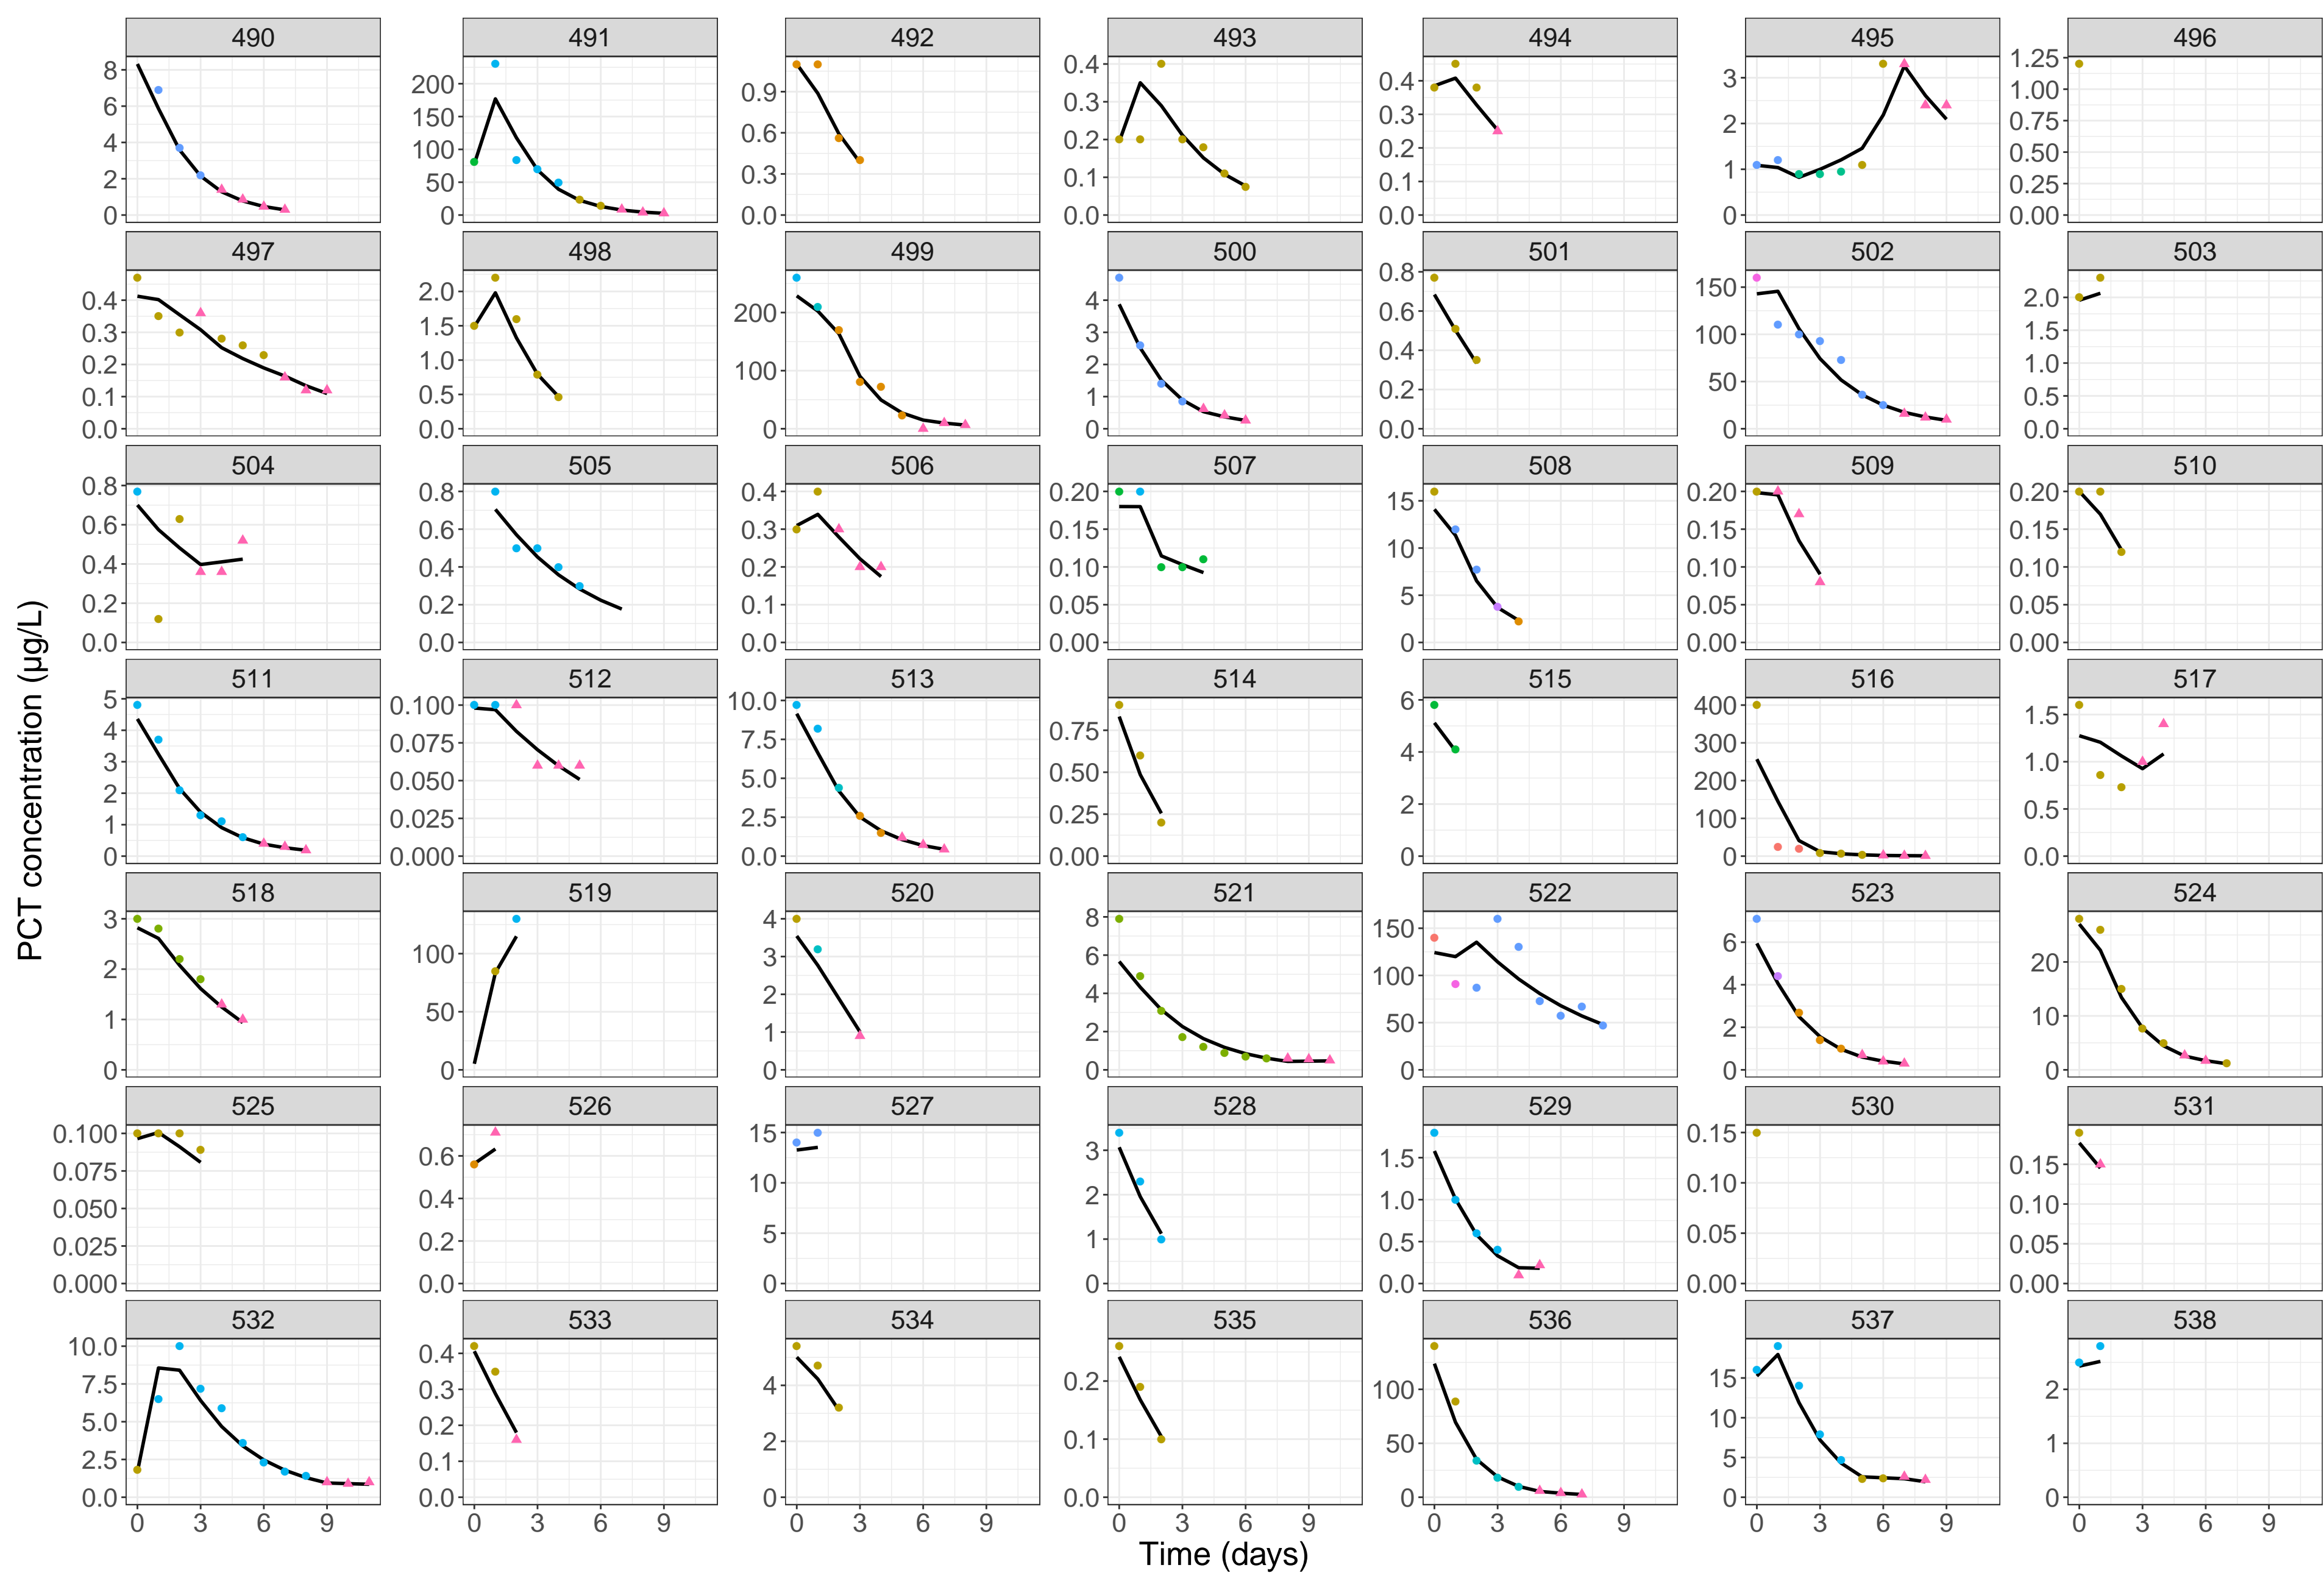

Figure S1. Procalcitonin profiles. Observed procalcitonin profiles (points) and model predictions (solid lines) for all individuals included in the analysis. Colored points indicate different treatments, consisting up to three antibiotics, while triangles indicates observation without any treatment.

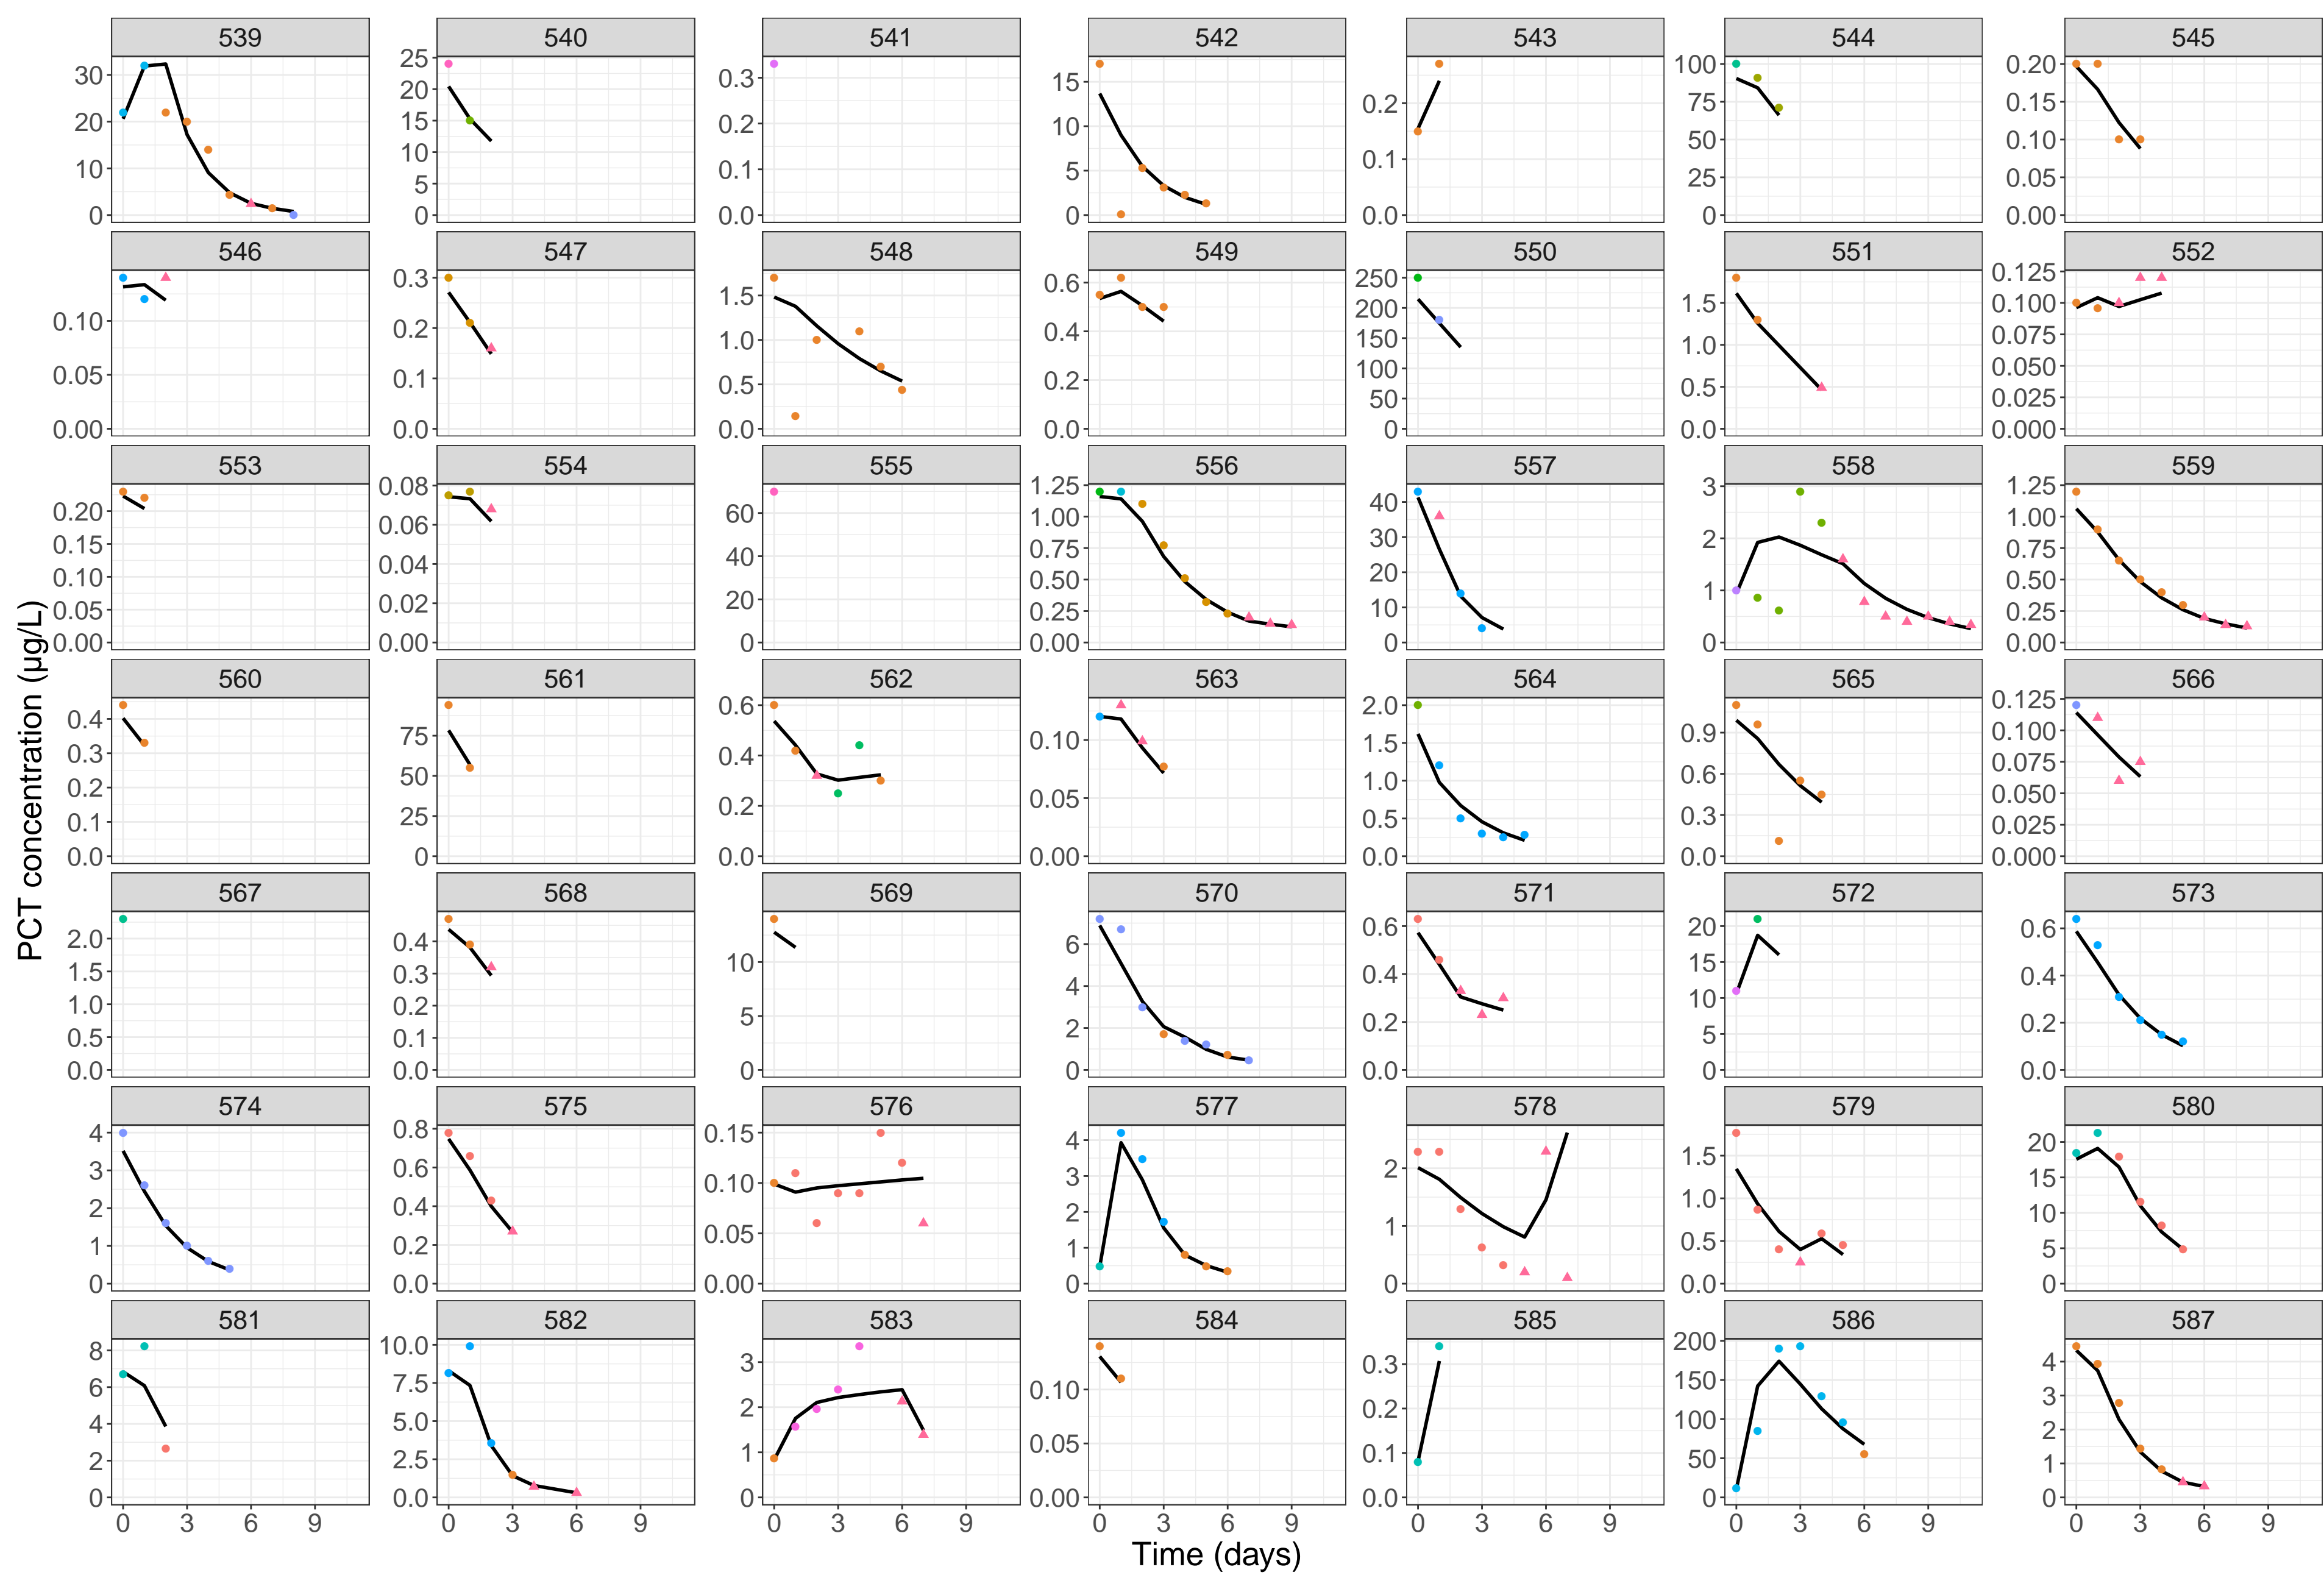

Figure S1. Procalcitonin profiles. Observed procalcitonin profiles (points) and model predictions (solid lines) for all individuals included in the analysis. Colored points indicate different treatments, consisting up to three antibiotics, while triangles indicates observation without any treatment.
