# Supplementary material for: Biomarker‐Guided Individualization of Antibiotic Therapy
Source: PubMed Central journal article supplement — Clin Pharmacol Ther. 2021 Mar 2;110(2):346–60. doi: 10.1002/cpt.2194 (PMC8359228; doi:10.1002/cpt.2194), 2021-03-02
Supplement: CPT-110-346-s004.pdf [file CPT-110-346-s004.pdf]

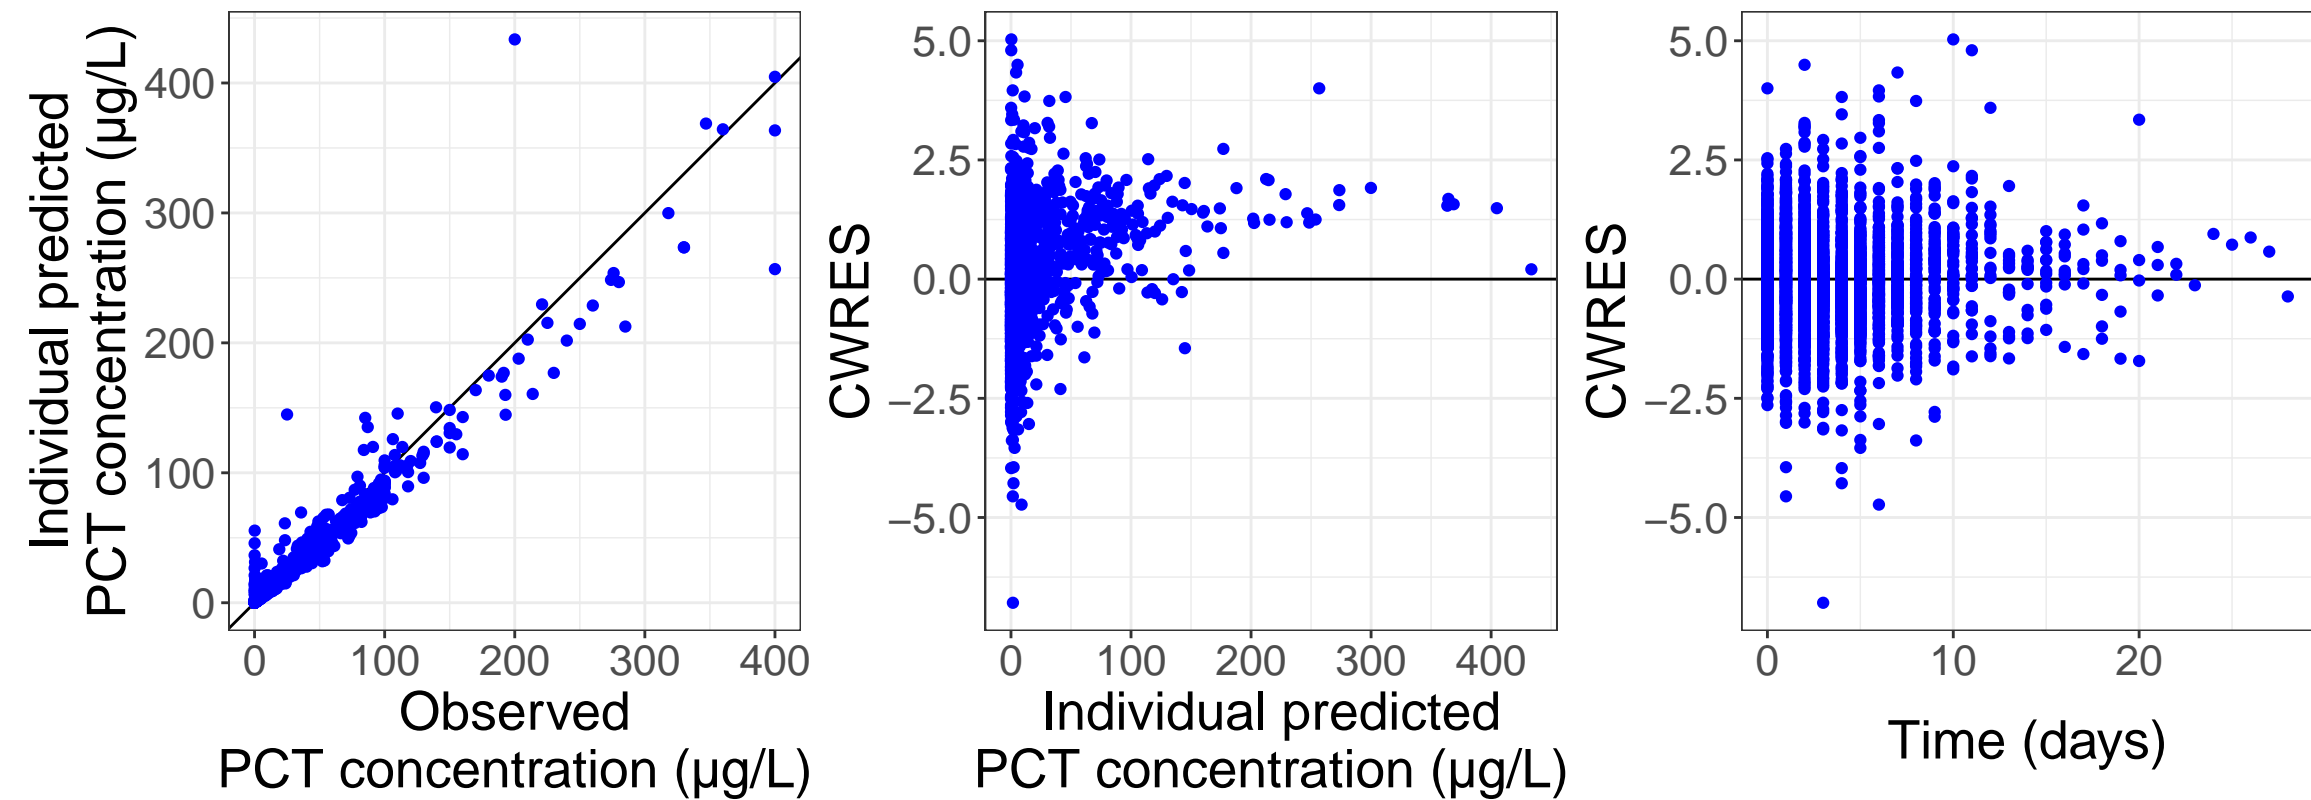

Figure S2. Goodness-of-fit (GOF) plots of procalcitonin model.

Standard GOF plots where individual prediction obtained using individual empirical Bayesian estimates parameters. Solid lines indicates line of unity (left) or zero (middle and right) for conditional weighted residual (CWRES) plots.
